# Supplementary material for: TREM2 as a Prognostic Biomarker for Osteosarcoma Microenvironment Remodeling
Source: J Oncol. 2023 Feb 17;2023:3677789. doi: 10.1155/2023/3677789 (PMC9957636; doi:10.1155/2023/3677789)
Supplement: Supplementary Materials — The Supplementary Figures and Tables for this article can be found online at: https://doi.org/10.6084/m9.figshare.21972614.v1. Supplementary Figure 1: the GO and KEGG enrichment analysis. (A, B) The GO enrichment analysis. (C, D) The KEGG enrichment analysis. Supplementary Figure 2: relationship between TREM2 expression and clinical features. (A) Relationship between TREM2 expression and age. (B) Relationship between TREM2 expression and gender. Supplementary Table 1: immune infiltration score. The row is the ID of the sample and the column is the score, including StromalScore, ImmuneScore, and ESTIMATEScore. Supplementary Table 2: differentially expressed genes between high and low ImmuneScore groups. The row is the gene name, and the column is the fold change after taking the logarithm with the base of 2 and the adjusted P value in turn. Supplementary Table 3: differentially expressed genes between high and low StromalScore groups. The row is the gene name, and the column is the fold change after taking the logarithm with the base of 2 and the adjusted P value in turn. Supplementary Table 4: common differentially expressed genes shared by ImmuneScore groups and StromalScore groups. The row is the gene name and the column is the fold change after taking the logarithm with the base of 2. [file 3677789.f1.zip › code.txt]

library(utils)
rforge <- "http://r-forge.r-project.org"
install.packages("estimate", repos=rforge, dependencies=TRUE)

if (!requireNamespace("BiocManager", quietly = TRUE))
    install.packages("BiocManager")
BiocManager::install("limma")

library(limma)
library(estimate)

setwd("C:\\Users\\16961\\Desktop\\bioinformatics\\n_TME\\07.estimate")      
inputFile="symbol.txt"                                          


rt=read.table(inputFile,sep="\t",header=T,check.names=F)
rt=as.matrix(rt)
rownames(rt)=rt[,1]
exp=rt[,2:ncol(rt)]
dimnames=list(rownames(exp),colnames(exp))
data=matrix(as.numeric(as.matrix(exp)),nrow=nrow(exp),dimnames=dimnames)
data=avereps(data)


group=sapply(strsplit(colnames(data),"\\-"),"[",4)
group=sapply(strsplit(group,""),"[",1)
group=gsub("2","1",group)
data=data[,group==0]
out=data[rowMeans(data)>0,]


out=rbind(ID=colnames(out),out)
write.table(out,file="uniq.symbol.txt",sep="\t",quote=F,col.names=F)


filterCommonGenes(input.f="uniq.symbol.txt", 
                  output.f="commonGenes.gct", 
                  id="GeneSymbol")

estimateScore(input.ds = "commonGenes.gct",
              output.ds="estimateScore.gct", 
              platform="illumina")


scores=read.table("estimateScore.gct",skip = 2,header = T)
rownames(scores)=scores[,1]
scores=t(scores[,3:ncol(scores)])
rownames(scores)=gsub("\\.","\\-",rownames(scores))
out=rbind(ID=colnames(scores),scores)
write.table(out,file="scores.txt",sep="\t",quote=F,col.names=F)

if (!requireNamespace("BiocManager", quietly = TRUE))
    install.packages("BiocManager")
BiocManager::install("limma")


library(limma)

expFile="scores.txt"           
surFile="time.txt"             
setwd("C:\\Users\\16961\\Desktop\\bioinformatics\\n_TME\\08.mergeTime")    


surTime=read.table(surFile,header=T,sep="\t",check.names=F,row.names=1)


rt=read.table(expFile,sep="\t",header=T,check.names=F,row.names=1)
data=as.matrix(rt)
rownames(data)=gsub("(.*)\\-(.*)\\-(.*)\\-(.*)\\-.*","\\1\\-\\2\\-\\3",rownames(data))
data=avereps(data)


sameSample=intersect(row.names(data),row.names(surTime))
data=data[sameSample,]
surTime=surTime[sameSample,]
out=cbind(surTime,data)
out=cbind(id=row.names(out),out)
write.table(out,file="scoreTime.txt",sep="\t",row.names=F,quote=F)

install.packages("survival")
install.packages("survminer")

library(survival)
library(survminer)

inputFile="scoreTime.txt"        
setwd("C:\\Users\\16961\\Desktop\\bioinformatics\\n_TME\\09.survival")    
rt=read.table(inputFile,header=T,sep="\t",check.names=F)      
rt$futime=rt$futime/365                                       

outTab=data.frame()
for(score in colnames(rt[,4:ncol(rt)])){
	
	a=ifelse(rt[,score]<=median(rt[,score]),"Low","High")
	
	diff=survdiff(Surv(futime, fustat) ~a,data = rt)
	pValue=1-pchisq(diff$chisq,df=1)
	
	fit=survfit(Surv(futime, fustat) ~ a, data = rt)
    
    scoreKm=cbind(score=score,KM=pValue)
	outTab=rbind(outTab,scoreKm)
	if(pValue<0.001){
		pValue="p<0.001"
	}else{
		pValue=paste0("p=",sprintf("%.03f",pValue))
	}
	titleName=score
	surPlot=ggsurvplot(fit, 
						data=rt,
						conf.int=TRUE,
						pval=pValue,
						pval.size=6,
						risk.table=T,
						ncensor.plot = TRUE,
						legend.labs=c("high","low"),
						legend.title=titleName,
						xlab="Time(years)",
						break.time.by = 1,
						risk.table.title="",
						palette=c("red", "blue"),
						risk.table.height=.25)          
	pdf(file=paste0("sur.",score,".pdf"), width = 6.5, height = 5.5,onefile = FALSE)
	print(surPlot)
	dev.off()
}

write.table(outTab,file="survResult.xls",sep="\t",row.names=F,quote=F)

if (!requireNamespace("BiocManager", quietly = TRUE))
    install.packages("BiocManager")
BiocManager::install("limma")

install.packages("ggpubr")

options(stringsAsFactors=F)
library(limma)
library(ggpubr)

scoreFile="scores.txt"            score
cliFile="clinical_origin.txt"            
setwd("C:\\Users\\16961\\Desktop\\bioinformatics\\n_TME\\10.cliCor")     

score
rt=read.table(scoreFile,sep="\t",header=T,check.names=F,row.names=1)
data=as.matrix(rt)
rownames(data)=gsub("(.*)\\-(.*)\\-(.*)\\-(.*)\\-.*","\\1\\-\\2\\-\\3",rownames(data))
data=avereps(data)


cli=read.table(cliFile,sep="\t",header=T,check.names=F,row.names=1)


samSample=intersect(row.names(data),row.names(cli))
data=data[samSample,]
cli=cli[samSample,]
rt=cbind(data,cli)
write.table(rt,file="rt.txt",sep="\t",quote=F,col.names=T)

¦Í
for(clinical in colnames(rt[,4:ncol(rt)])){
	for(score in colnames(rt[,1:3])){
		data=rt[c(score,clinical)]
		colnames(data)=c("score","clinical")
		data=data[(data[,"clinical"]!="unknow"),]
		
		group=levels(factor(data$clinical))
		data$clinical=factor(data$clinical, levels=group)
		comp=combn(group,2)
		my_comparisons=list()
	    for(i in 1:ncol(comp)){my_comparisons[[i]]<-comp[,i]}
		boxplot
		boxplot=ggboxplot(data, x="clinical", y="score", color="clinical",
		          xlab=clinical,
		          ylab=score,
		          legend.title=clinical,
		          add = "jitter")+ 
			stat_compare_means(comparisons = my_comparisons)
		
		pdf(file=paste0(score,".",clinical,".pdf"),width=5.5,height=5)
		print(boxplot)
		dev.off()
	}
}

¼ÇµÃÈ¥³ýÕý³£Ñù±¾
if (!requireNamespace("BiocManager", quietly = TRUE))
    install.packages("BiocManager")
BiocManager::install("limma")

install.packages("pheatmap")

e
library("limma")
library("pheatmap")

fdrFilter=0.05                    fdr
logFCfilter=1                     logFC
scoreType="StromalScore"          StromalScore
inputFile="symbol.txt"            
scoreFile="scores.txt"            score
setwd("C:\\Users\\16961\\Desktop\\bioinformatics\\n_TME\\11.StromalDiff")    ¨´


rt=read.table(inputFile,sep="\t",header=T,check.names=F)
rt=as.matrix(rt)
rownames(rt)=rt[,1]
exp=rt[,2:ncol(rt)]
dimnames=list(rownames(exp),colnames(exp))
data=matrix(as.numeric(as.matrix(exp)),nrow=nrow(exp),dimnames=dimnames)
data=avereps(data)
data=data[rowMeans(data)>0.1,]

É¾³ýÕý³£Ñù±¾
group=sapply(strsplit(colnames(data),"\\-"),"[",4)
group=sapply(strsplit(group,""),"[",1)
group=gsub("2","1",group)
data=data[,group==0]

score,score¦Ë
score=read.table(scoreFile,sep="\t",header=T,check.names=F)
med=median(score[,scoreType])
conTab=score[score[,scoreType]<=med,]
treatTab=score[score[,scoreType]>med,]
con=as.vector(conTab[,1])
treat=as.vector(treatTab[,1])
conNum=length(con)
treatNum=length(treat)
data=cbind(data[,con],data[,treat])


outTab=data.frame()
Type=c(rep(1,conNum),rep(2,treatNum))
for(i in row.names(data)){
	geneName=unlist(strsplit(i,"\\|",))[1]
	geneName=gsub("\\/", "_", geneName)
	rt=rbind(expression=data[i,],Type=Type)
	rt=as.matrix(t(rt))
	wilcoxTest<-wilcox.test(expression ~ Type, data=rt)
	conGeneMeans=mean(data[i,1:conNum])
	treatGeneMeans=mean(data[i,(conNum+1):ncol(data)])
	logFC=log2(treatGeneMeans)-log2(conGeneMeans)  
	pvalue=wilcoxTest$p.value
	conMed=median(data[i,1:conNum])
	treatMed=median(data[i,(conNum+1):ncol(data)])
	diffMed=treatMed-conMed
	if( ((logFC>0) & (diffMed>0)) | ((logFC<0) & (diffMed<0)) ){  
		  outTab=rbind(outTab,cbind(gene=i,conMean=conGeneMeans,treatMean=treatGeneMeans,logFC=logFC,pValue=pvalue))
	 }
}
pValue=outTab[,"pValue"]
fdr=p.adjust(as.numeric(as.vector(pValue)),method="fdr")
outTab=cbind(outTab,fdr=fdr)

§Ý
write.table(outTab,file="Stromal.all.xls",sep="\t",row.names=F,quote=F)


diffSig=outTab[( abs(as.numeric(as.vector(outTab$logFC)))>logFCfilter & as.numeric(as.vector(outTab$fdr))<fdrFilter),]
write.table(diffSig,file="Stromal.Diff.xls",sep="\t",row.names=F,quote=F)
write.table(diffSig,file="Stromal.Diff.txt",sep="\t",row.names=F,quote=F)


diffExp=rbind(ID=colnames(data[as.vector(diffSig[,1]),]),data[as.vector(diffSig[,1]),])
write.table(diffExp,file="Stromal.diffExp.txt",sep="\t",col.names=F,quote=F)


geneNum=50      ¦Ì
diffSig=diffSig[order(as.numeric(as.vector(diffSig$logFC))),]
diffGeneName=as.vector(diffSig[,1])
diffLength=length(diffGeneName)
hmGene=c()
if(diffLength>(2*geneNum)){
    hmGene=diffGeneName[c(1:geneNum,(diffLength-geneNum+1):diffLength)]
}else{
    hmGene=diffGeneName
}
hmExp=data[hmGene,]
hmExp=log2(hmExp+0.001)
Type=c(rep("Low",conNum),rep("High",treatNum))
names(Type)=colnames(data)
Type=as.data.frame(Type)
pdf(file="Stromal.heatmap.pdf",height=8,width=10)
pheatmap(hmExp, 
         annotation=Type, 
         color = colorRampPalette(c("blue", "white", "red"))(50),
         cluster_cols =F,
         show_colnames = F,
         fontsize = 8,
         fontsize_row=6,
         fontsize_col=8)
dev.off()


install.packages("VennDiagram")

library(VennDiagram)                                           e
setwd("C:\\Users\\16961\\Desktop\\bioinformatics\\n_TME\\13.diffVenn")     ¨´

StromalFile="Stromal.Diff.txt"      
ImmuneFile="Immune.Diff.txt"        
upList=list()
downList=list()

Stromal
Stromal=read.table(StromalFile, header=T, sep="\t", check.names=F,row.names=1)
upList[["Stromal"]]=row.names(Stromal[Stromal[,"logFC"]>0,])
downList[["Stromal"]]=row.names(Stromal[Stromal[,"logFC"]<0,])

Immune
Immune=read.table(ImmuneFile, header=T, sep="\t", check.names=F,row.names=1)
upList[["Immune"]]=row.names(Immune[Immune[,"logFC"]>0,])
downList[["Immune"]]=row.names(Immune[Immune[,"logFC"]<0,])

venn
upVenn=venn.diagram(upList,filename=NULL,main="Up",main.cex = 2,
             fill=c("darkblue", "darkgreen"),cat.cex=1.2)
pdf(file="UP.venn.pdf",width=9,height=9)
grid.draw(upVenn)
dev.off()
upGenes=Reduce(intersect,upList)

¦Ìvenn
downVenn=venn.diagram(downList,filename=NULL,main="Down",main.cex = 2,
             fill=c("darkblue", "darkgreen"),cat.cex=1.2)
pdf(file="DOWN.venn.pdf",width=9,height=9)
grid.draw(downVenn)
dev.off()
downGenes=Reduce(intersect,downList)


upLogFC=(as.matrix(Stromal)[upGenes,"logFC"]+as.matrix(Immune)[upGenes,"logFC"])/2
downLogFC=(as.matrix(Stromal)[downGenes,"logFC"]+as.matrix(Immune)[downGenes,"logFC"])/2
logFC=c(upLogFC,downLogFC)
outTab=as.data.frame(logFC)
outTab=cbind(ID=row.names(outTab),outTab)
colnames(outTab)=c("Gene","logFC")
write.table(file="intersectGenes.txt",outTab,sep="\t",quote=F,row.names=F)

if (!requireNamespace("BiocManager", quietly = TRUE))
    install.packages("BiocManager")
BiocManager::install("org.Hs.eg.db")

library("org.Hs.eg.db")         e
setwd("C:\\Users\\16961\\Desktop\\bioinformatics\\n_TME\\14.symbo2id")              ¨´
rt=read.table("intersectGenes.txt",sep="\t",check.names=F,header=T)     
genes=as.vector(rt[,1])
entrezIDs <- mget(genes, org.Hs.egSYMBOL2EG, ifnotfound=NA)       id
entrezIDs <- as.character(entrezIDs)
out=cbind(rt,entrezID=entrezIDs)
write.table(out,file="id.txt",sep="\t",quote=F,row.names=F)       

install.packages("colorspace")
install.packages("stringi")
install.packages("ggplot2")

install.packages("ggnewscale")
if (!requireNamespace("BiocManager", quietly = TRUE))
    install.packages("BiocManager")
BiocManager::install("DOSE",force = TRUE)
BiocManager::install("clusterProfiler")
BiocManager::install("enrichplot",force = TRUE)

e
library(ggnewscale)
library("clusterProfiler")
library("org.Hs.eg.db")
library("enrichplot")
library("ggplot2")

pvalueFilter=0.05         p
qvalueFilter=0.05         p

setwd("E:\\0__SCI_record\\2_ÉúÐÅ_Ö×ÁöÎ¢»·¾³_TREM2Óë¹ÇÈâÁö\\15.GO")         ¨´
rt=read.table("id.txt",sep="\t",header=T,check.names=F)      id.txt
rt=rt[is.na(rt[,"entrezID"])==F,]                            idNA
gene=rt$entrezID
geneFC=2^rt$logFC
names(geneFC)=gene


colorSel="qvalue"
if(qvalueFilter>0.05){
	colorSel="pvalue"
}

GO
kk=enrichGO(gene = gene,OrgDb = org.Hs.eg.db, pvalueCutoff =1, qvalueCutoff = 1, ont="all", readable =T)
GO=as.data.frame(kk)
GO=GO[(GO$pvalue<pvalueFilter & GO$qvalue<qvalueFilter),]
GOO=read.table("GOO.txt",sep="\t",header=T,check.names=F)  
œƒ
write.table(GO,file="GO.txt",sep="\t",quote=F,row.names = F)

Term
showNum=3
if(nrow(GO)<30){
	showNum=nrow(GO)
}


pdf(file="GO-barplot.pdf",width = 9,height = 7)
bar=barplot(kk, drop = TRUE, showCategory =showNum,split="ONTOLOGY",color = colorSel) + facet_grid(ONTOLOGY~., scale='free')
print(bar)
dev.off()
		

pdf(file="GO-bubble.pdf",width = 9,height = 7)
bub=dotplot(kk,showCategory = showNum, orderBy = "GeneRatio",split="ONTOLOGY", color = colorSel) + facet_grid(ONTOLOGY~., scale='free')
print(bub)
dev.off()
		

pdf(file="circos.pdf",width = 14,height = 6.5)
cnet=cnetplot(kk, foldChange=geneFC, showCategory = 5, circular = TRUE, colorEdge = TRUE)
print(cnet)
dev.off()

install.packages("colorspace")
install.packages("stringi")
install.packages("ggplot2")

if (!requireNamespace("BiocManager", quietly = TRUE))
    install.packages("BiocManager")
BiocManager::install("DOSE")
BiocManager::install("clusterProfiler")
BiocManager::install("enrichplot")


e
library("clusterProfiler")
library("org.Hs.eg.db")
library("enrichplot")
library("ggplot2")

pvalueFilter=0.05        p
qvalueFilter=0.05        p

setwd("E:\\0__SCI_record\\2_ÉúÐÅ_Ö×ÁöÎ¢»·¾³_TREM2Óë¹ÇÈâÁö\\16.KEGG")        ¨´
rt=read.table("id.txt",sep="\t",header=T,check.names=F)       id.txt
rt=rt[is.na(rt[,"entrezID"])==F,]                             idNA
gene=rt$entrezID
geneFC=2^rt$logFC
names(geneFC)=gene


colorSel="qvalue"
if(qvalueFilter>0.05){
	colorSel="pvalue"
}

kegg
kk <- enrichKEGG(gene = gene, organism = "hsa", pvalueCutoff =1, qvalueCutoff =1)
KEGG=as.data.frame(kk)
KEGG$geneID=as.character(sapply(KEGG$geneID,function(x)paste(rt$Gene[match(strsplit(x,"/")[[1]],as.character(rt$entrezID))],collapse="/")))
KEGG=KEGG[(KEGG$pvalue<pvalueFilter & KEGG$qvalue<qvalueFilter),]
œƒ
write.table(KEGG,file="KEGG.txt",sep="\t",quote=F,row.names = F)

Term
showNum=9
if(nrow(KEGG)<showNum){
	showNum=nrow(KEGG)
}


pdf(file="KEGG-barplot.pdf",width = 9,height = 7)
barplot(kk, drop = TRUE, showCategory = showNum, color = colorSel)
dev.off()


pdf(file="KEGG-bubble.pdf",width = 9,height = 7)
dotplot(kk, showCategory = showNum, orderBy = "GeneRatio",color = colorSel)
dev.off()


pdf(file="circos.pdf",width = 9,height = 6.5)
kkx=setReadable(kk, 'org.Hs.eg.db', 'ENTREZID')
cnetplot(kkx, foldChange=geneFC,showCategory = 5, circular = TRUE, colorEdge = TRUE,node_label="all")
dev.off()

setwd("C:\\Users\\16961\\Desktop\\bioinformatics\\n_TME\\20.count")       ¨´
rt=read.table("network.txt", header=T, sep="\t", check.names =FALSE)   
tb=table(c(as.vector(rt[,1]),as.vector(rt[,2])))
tb=sort(tb,decreasing =T)


outTab=as.data.frame(tb)
colnames(outTab)=c("Gene","Count")
write.table(outTab,file="ppiCount.txt",sep="\t",quote=F,row.names=F)


showNum=30
if(nrow(tb)<showNum){
	showNum=nrow(KEGG)
}
n=as.matrix(tb)[1:showNum,]


pdf(file="barplot.pdf",width=7,height=6)
par(mar=c(5,8,2,3),xpd=T)
bar=barplot(n,horiz=TRUE,col="skyblue",names=FALSE,xlim=c(0,ceiling(max(n)/5)*5),xlab="Number of adjacent nodes")
text(x=n-0.5,y=bar,n)
text(x=-0.2,y=bar,label=names(n),xpd=T,pos=2)
dev.off()

if (!requireNamespace("BiocManager", quietly = TRUE))
    install.packages("BiocManager")
BiocManager::install("limma")

library(limma)

expFile="symbol.txt"                                         
cliFile="time.txt"                                           
geneFile="intersectGenes.txt"                                §Ò
setwd("C:\\Users\\16961\\Desktop\\bioinformatics\\n_TME\\21.preCox")     


rt=read.table(expFile,sep="\t",header=T,check.names=F)
rt=as.matrix(rt)
rownames(rt)=rt[,1]
exp=rt[,2:ncol(rt)]
dimnames=list(rownames(exp),colnames(exp))
data=matrix(as.numeric(as.matrix(exp)),nrow=nrow(exp),dimnames=dimnames)
data=avereps(data)
data=data[rowMeans(data)>0,]

§Ò
gene=read.table(geneFile,header=T,sep="\t",check.names=F)
data=data[as.vector(gene[,1]),]


group=sapply(strsplit(colnames(data),"\\-"),"[",4)
group=sapply(strsplit(group,""),"[",1)
group=gsub("2","1",group)
data=data[,group==0]
colnames(data)=gsub("(.*)\\-(.*)\\-(.*)\\-(.*)\\-.*","\\1\\-\\2\\-\\3",colnames(data))
data=t(data)
data=avereps(data)


cli=read.table(cliFile,sep="\t",check.names=F,header=T,row.names=1)     


sameSample=intersect(row.names(data),row.names(cli))
data=data[sameSample,]
cli=cli[sameSample,]
out=cbind(cli,data)
out=cbind(id=row.names(out),out)
write.table(out,file="expTime.txt",sep="\t",row.names=F,quote=F)

install.packages("survival")

library(survival)             e
inputFile="expTime.txt"       
pFilter=0.05                  
setwd("C:\\Users\\16961\\Desktop\\bioinformatics\\n_TME\\22.cox")       ¨´


rt=read.table(inputFile,header=T,sep="\t",check.names=F,row.names=1)
rt$futime=rt$futime/365           ¦Ë365

outTab=data.frame()
for(gene in colnames(rt[,3:ncol(rt)])){
	cox
	cox=coxph(Surv(futime, fustat) ~ rt[,gene], data = rt)
	coxSummary = summary(cox)
	coxP=coxSummary$coefficients[,"Pr(>|z|)"]
	
	KM
	group=ifelse(rt[,gene]<=median(rt[,gene]),"Low","High")
	diff=survdiff(Surv(futime, fustat) ~ group,data = rt)
	pValue=1-pchisq(diff$chisq,df=1)
	
	
	if((pValue<pFilter) & (coxP<pFilter)){
		outTab=rbind(outTab,
		         cbind(gene=gene,
		               KM=pValue,
		               HR=coxSummary$conf.int[,"exp(coef)"],
		               HR.95L=coxSummary$conf.int[,"lower .95"],
		               HR.95H=coxSummary$conf.int[,"upper .95"],
				       pvalue=coxP) )		
	}
}
p
write.table(outTab,file="cox.result.txt",sep="\t",row.names=F,quote=F)


rt <- read.table("cox.result.txt",header=T,sep="\t",row.names=1,check.names=F)
gene <- rownames(rt)
hr <- sprintf("%.3f",rt$"HR")
hrLow  <- sprintf("%.3f",rt$"HR.95L")
hrHigh <- sprintf("%.3f",rt$"HR.95H")
Hazard.ratio <- paste0(hr,"(",hrLow,"-",hrHigh,")")
pVal <- ifelse(rt$pvalue<0.001, "<0.001", sprintf("%.3f", rt$pvalue))


pdf(file="forest.pdf", width = 7,height = 6)
n <- nrow(rt)
nRow <- n+1
ylim <- c(1,nRow)
layout(matrix(c(1,2),nc=2),width=c(3,2))


xlim = c(0,3)
par(mar=c(4,2.5,2,1))
plot(1,xlim=xlim,ylim=ylim,type="n",axes=F,xlab="",ylab="")
text.cex=0.8
text(0,n:1,gene,adj=0,cex=text.cex)
text(1.5-0.5*0.2,n:1,pVal,adj=1,cex=text.cex);text(1.5-0.5*0.2,n+1,'pvalue',cex=text.cex,font=2,adj=1)
text(3,n:1,Hazard.ratio,adj=1,cex=text.cex);text(3,n+1,'Hazard ratio',cex=text.cex,font=2,adj=1,)


par(mar=c(4,1,2,1),mgp=c(2,0.5,0))
xlim = c(0,max(as.numeric(hrLow),as.numeric(hrHigh)))
plot(1,xlim=xlim,ylim=ylim,type="n",axes=F,ylab="",xaxs="i",xlab="Hazard ratio")
arrows(as.numeric(hrLow),n:1,as.numeric(hrHigh),n:1,angle=90,code=3,length=0.05,col="darkblue",lwd=2.5)
abline(v=1,col="black",lty=2,lwd=2)
boxcolor = ifelse(as.numeric(hr) > 1, 'red', 'green')
points(as.numeric(hr), n:1, pch = 15, col = boxcolor, cex=1.3)
axis(1)
dev.off()

install.packages("VennDiagram")

library(VennDiagram)             e
ppiFile="ppiCount.txt"           ppi
coxFile="cox.result.txt"         COX
setwd("C:\\Users\\16961\\Desktop\\bioinformatics\\n_TME\\23.geneVenn")     ¨´
geneList=list()

PPI
ppi=read.table(ppiFile, header=T, sep="\t", check.names=F,row.names=1)
geneNum=30
if(nrow(ppi)<geneNum){
	geneNum=nrow(KEGG)
}
geneList[["PPI"]]=row.names(ppi)[1:geneNum]

COX
cox=read.table(coxFile, header=T, sep="\t", check.names=F,row.names=1)
geneList[["COX"]]=row.names(cox)

venn
venn.plot=venn.diagram(geneList,filename=NULL,main="Intersection",main.cex = 2,
             fill=c("darkblue", "darkgreen"),cat.cex=1.2)
pdf(file="geneVenn.pdf",width=7,height=7)
grid.draw(venn.plot)
dev.off()


coreGene=Reduce(intersect,geneList)
write.table(file="prognosticCoreGene.txt",coreGene,sep="\t",quote=F,row.names=F,col.names=F)


install.packages("survival")
install.packages("survminer")

e
library(survival)
library(survminer)

inputFile="expTime.txt"      
gene="HLA-DMA"                 
setwd("C:\\Users\\16961\\Desktop\\bioinformatics\\n_TME\\26.geneSur")    ¨´


rt=read.table(inputFile,header=T,sep="\t",check.names=F)
rt$futime=rt$futime/365        365¦Ë

gene¦Ë
a=ifelse(rt[,gene]<=median(rt[,gene]),"Low","High")

diff=survdiff(Surv(futime, fustat) ~a,data = rt)
pValue=1-pchisq(diff$chisq,df=1)

fit=survfit(Surv(futime, fustat) ~ a, data = rt)

if(pValue<0.001){
	pValue="p<0.001"
}else{
	pValue=paste0("p=",sprintf("%.03f",pValue))
}
titleName=gene
surPlot=ggsurvplot(fit, 
				data=rt,
				conf.int=TRUE,
				pval=pValue,
				pval.size=6,
				risk.table=T,
				ncensor.plot = TRUE,
				legend.labs=c("high","low"),
				legend.title=titleName,
				xlab="Time(years)",
				break.time.by = 1,
				risk.table.title="",
				palette=c("red", "blue"),
				risk.table.height=.25)          
pdf(file=paste0("sur.",gene,".pdf"), width = 6.5, height = 5.5,onefile = FALSE)
print(surPlot)
dev.off()

library(org.Hs.eg.db)
library(clusterProfiler)
library(enrichplot)
library(ggplot2)
setwd("C:\\Users\\16961\\Desktop") 
data3=read.table("symbol.txt",sep="\t",check.names=F,header=T)
gene_name=as.vector(data3[,1])
geneID <- mget(gene_name, org.Hs.egSYMBOL2EG, ifnotfound=NA)
geneID <- as.character(geneID)
data=cbind(data3,entrezID=geneID)
write.table(data,"name_id.txt",sep="\t",quote = F,row.names = F)
mydata=data[,c("entrezID","logFC")]
mydata$logFC=sort(mydata$logFC,decreasing = T)
mygenelist=as.numeric(as.character(mydata$logFC))
names(mygenelist)=as.character(mydata$entrezID)
mygse <- gseKEGG(geneList     = mygenelist,
                 organism     = 'hsa',keyType = "kegg",
                 pvalueCutoff = 0.05,
                 pAdjustMethod = "none" )
gse_result <- as.data.frame(mygse)
write.table(gse_result,"gse_result.txt",quote = F,sep = "\t")

gseaplot2(mygse, geneSetID = rownames(mygse@result)[(order(mygse@result$enrichmentScore))][1:5])

install.packages('e1071')

if (!requireNamespace("BiocManager", quietly = TRUE))
    install.packages("BiocManager")
BiocManager::install("preprocessCore")

if (!requireNamespace("BiocManager", quietly = TRUE))
    install.packages("BiocManager")
BiocManager::install("limma")


library("limma")             e
expFile="symbol.txt"         
setwd("C:\\Users\\16961\\Desktop\\bioinformatics\\n_TME\\31.CIBERSORT")        ¨´


rt=read.table(expFile,sep="\t",header=T,check.names=F)
rt=as.matrix(rt)
rownames(rt)=rt[,1]
exp=rt[,2:ncol(rt)]
dimnames=list(rownames(exp),colnames(exp))
data=matrix(as.numeric(as.matrix(exp)),nrow=nrow(exp),dimnames=dimnames)
data=avereps(data)


group=sapply(strsplit(colnames(data),"\\-"),"[",4)
group=sapply(strsplit(group,""),"[",1)
group=gsub("2","1",group)
data=data[,group==0]


data=data[rowMeans(data)>0,]


v <-voom(data, plot = F, save.plot = F)
out=v$E
out=rbind(ID=colnames(out),out)
write.table(out,file="uniq.symbol.txt",sep="\t",quote=F,col.names=F)        

CIBERSORT
source("TMEimmune31.CIBERSORT.R")
results=CIBERSORT("ref.txt", "uniq.symbol.txt", perm=100, QN=TRUE)


install.packages("corrplot")

library(corrplot)                   e
input="CIBERSORT-Results.txt"       
outpdf="barplot.pdf"                
pFilter=0.05                        CIBERSORT
setwd("C:\\Users\\16961\\Desktop\\bioinformatics\\n_TME\\32.immunePlot")    ¨´


immune=read.table("CIBERSORT-Results.txt",sep="\t",header=T,row.names=1,check.names=F)
immune=immune[immune[,"P-value"]<pFilter,]
immune=as.matrix(immune[,1:(ncol(immune)-3)])
data=t(immune)
col=rainbow(nrow(data),s=0.7,v=0.7)


pdf(outpdf,height=10,width=22)
par(las=1,mar=c(8,5,4,16),mgp=c(3,0.1,0),cex.axis=1.5)
a1 = barplot(data,col=col,yaxt="n",ylab="Relative Percent",xaxt="n",cex.lab=1.8)
a2=axis(2,tick=F,labels=F)
axis(2,a2,paste0(a2*100,"%"))
axis(1,a1,labels=F)
par(srt=60,xpd=T);text(a1,-0.02,colnames(data),adj=1,cex=0.6);par(srt=0)
ytick2 = cumsum(data[,ncol(data)])
ytick1 = c(0,ytick2[-length(ytick2)])
legend(par('usr')[2]*0.98,par('usr')[4],legend=rownames(data),col=col,pch=15,bty="n",cex=1.3)
dev.off()


pdf("corrplot.pdf",height=14,width=14)              
par(oma=c(0.5,1,1,1.2))
M=cor(immune)
corrplot(M, order = "AOE", type = "upper", tl.pos = "lt")
corrplot(M, add = TRUE, type = "lower", method = "number", order = "AOE",
         col = "black", diag = FALSE, tl.pos = "n", cl.pos = "n")
dev.off()

if (!requireNamespace("BiocManager", quietly = TRUE))
    install.packages("BiocManager")
BiocManager::install("limma")

install.packages("vioplot")


e
library(limma)
library(vioplot)

immuneFile="CIBERSORT-Results.txt"         
expFile="symbol.txt"                       
gene="TREM2"                               
pFilter=0.05                               CIBERSORT
setwd("C:\\Users\\16961\\Desktop\\bioinformatics\\n_TME\\33.vioplot")       ¨´


immune=read.table(immuneFile,sep="\t",header=T,row.names=1,check.names=F)
immune=immune[immune[,"P-value"]<pFilter,]
immune=as.matrix(immune[,1:(ncol(immune)-3)])


rt=read.table(expFile,sep="\t",header=T,check.names=F)
rt=as.matrix(rt)
rownames(rt)=rt[,1]
exp=rt[,2:ncol(rt)]
dimnames=list(rownames(exp),colnames(exp))
data=matrix(as.numeric(as.matrix(exp)),nrow=nrow(exp),dimnames=dimnames)
data=avereps(data)


group=sapply(strsplit(colnames(data),"\\-"),"[",4)
group=sapply(strsplit(group,""),"[",1)
group=gsub("2","1",group)
data=data[,group==0]


lowName=colnames(data)[data[gene,]<=median(data[gene,])]
highName=colnames(data)[data[gene,]>median(data[gene,])]


lowImm=intersect(row.names(immune),lowName)
highImm=intersect(row.names(immune),highName)
rt=rbind(immune[lowImm,],immune[highImm,])
lowNum=length(lowImm)
highNum=length(highImm)

§³
outTab=data.frame()
pdf("vioplot.pdf",height=8,width=13)
par(las=1,mar=c(10,6,3,3))
x=c(1:ncol(rt))
y=c(1:ncol(rt))
plot(x,y,
     xlim=c(0,63),ylim=c(min(rt),max(rt)+0.02),
     main="",xlab="", ylab="Fraction",
     pch=21,
     col="white",
     xaxt="n")

vioplot¨²
for(i in 1:ncol(rt)){
	  if(sd(rt[1:lowNum,i])==0){
	    rt[1,i]=0.001
	  }
	  if(sd(rt[(lowNum+1):(lowNum+highNum),i])==0){
	    rt[(lowNum+1),i]=0.001
	  }
	  lowData=rt[1:lowNum,i]
	  highData=rt[(lowNum+1):(lowNum+highNum),i]
	  vioplot(lowData,at=3*(i-1),lty=1,add = T,col = 'green')
	  vioplot(highData,at=3*(i-1)+1,lty=1,add = T,col = 'red')
	  wilcoxTest=wilcox.test(lowData,highData)
	  p=wilcoxTest$p.value
	  if(p<pFilter){
	      cellPvalue=cbind(Cell=colnames(rt)[i],pvalue=p)
		  outTab=rbind(outTab,cellPvalue)
	  }
	  mx=max(c(lowData,highData))
	  lines(c(x=3*(i-1)+0.2,x=3*(i-1)+0.8),c(mx,mx))
	  text(x=3*(i-1)+0.5, y=mx+0.02, labels=ifelse(p<0.001, paste0("p<0.001"), paste0("p=",sprintf("%.03f",p))), cex = 0.8)
}
text(seq(1,64,3),-0.05,xpd = NA,labels=colnames(rt),cex = 1,srt = 45,pos=2)
dev.off()

p
write.table(outTab,file="diff.result.txt",sep="\t",row.names=F,quote=F)


if (!requireNamespace("BiocManager", quietly = TRUE))
    install.packages("BiocManager")
BiocManager::install("limma")

install.packages("ggplot2")
install.packages("ggpubr")
install.packages("ggExtra")

library(limma)
library(ggplot2)
library(ggpubr)
library(ggExtra)

immuneFile="CIBERSORT-Results.txt"         
expFile="symbol.txt"                       
gene="TREM2"                               
pFilter=0.05                               CIBERSORT
setwd("C:\\Users\\16961\\Desktop\\bioinformatics\\n_TME\\34.immuneCor")     ¨´


immune=read.table(immuneFile,sep="\t",header=T,row.names=1,check.names=F)
immune=immune[immune[,"P-value"]<pFilter,]
immune=as.matrix(immune[,1:(ncol(immune)-3)])


rt=read.table(expFile,sep="\t",header=T,check.names=F)
rt=as.matrix(rt)
rownames(rt)=rt[,1]
exp=rt[,2:ncol(rt)]
dimnames=list(rownames(exp),colnames(exp))
data=matrix(as.numeric(as.matrix(exp)),nrow=nrow(exp),dimnames=dimnames)
data=avereps(data)


group=sapply(strsplit(colnames(data),"\\-"),"[",4)
group=sapply(strsplit(group,""),"[",1)
group=gsub("2","1",group)
data=data[,group==0]


data=rbind(data,gene=data[gene,])
exp=t(data[c("gene",gene),])
sameSample=intersect(row.names(immune),row.names(exp))
immune1=immune[sameSample,]
exp1=exp[sameSample,]


outTab=data.frame()
x=as.numeric(exp1[,1])

for(j in colnames(immune1)[1:22]){
	y=as.numeric(immune1[,j])
	if(sd(y)>0.001){
		df1=as.data.frame(cbind(x,y))
		corT=cor.test(x,y,method="spearman")
		cor=corT$estimate
		pValue=corT$p.value
		p1=ggplot(df1, aes(x, y)) + 
			ylab(j)+xlab(gene)+
			geom_point()+ geom_smooth(method="lm",formula=y~x) + theme_bw()+
			stat_cor(method = 'spearman', aes(x =x, y =y))
		if(pValue<pFilter){
			pdf(file=paste0(j,".pdf"),width=5,height=5)
			print(p1)
			dev.off()
			outTab=rbind(outTab,cbind(Cell=j,pValue))
		}
	}
}
write.table(outTab,file="immuneCor.result.txt",sep="\t",row.names=F,quote=F)

install.packages("VennDiagram")


library(VennDiagram)                 e
diffFile="diff.result.txt"           
corFile="immuneCor.result.txt"       
setwd("C:\\Users\\16961\\Desktop\\bioinformatics\\n_TME\\35.immuneVenn")     ¨´
geneList=list()

diff
diff=read.table(diffFile, header=T, sep="\t", check.names=F,row.names=1)
geneList[["diff"]]=row.names(diff)

cor
cor=read.table(corFile, header=T, sep="\t", check.names=F,row.names=1)
geneList[["cor"]]=row.names(cor)

venn
venn.plot=venn.diagram(geneList,filename=NULL,main="Intersection",main.cex = 2,
             fill=c("darkblue", "darkgreen"),cat.cex=1.2)
pdf(file="immuneVenn.pdf",width=6,height=6)
grid.draw(venn.plot)
dev.off()


corImmuneCell=Reduce(intersect,geneList)
write.table(file="geneRelatedCell.txt",corImmuneCell,sep="\t",quote=F,row.names=F,col.names=F)
