# Supplementary material for: TREM2 as a Prognostic Biomarker for Osteosarcoma Microenvironment Remodeling
Source: J Oncol. 2023 Feb 17;2023:3677789. doi: 10.1155/2023/3677789 (PMC9957636; doi:10.1155/2023/3677789)
Supplement: Supplementary Materials — The Supplementary Figures and Tables for this article can be found online at: https://doi.org/10.6084/m9.figshare.21972614.v1. Supplementary Figure 1: the GO and KEGG enrichment analysis. (A, B) The GO enrichment analysis. (C, D) The KEGG enrichment analysis. Supplementary Figure 2: relationship between TREM2 expression and clinical features. (A) Relationship between TREM2 expression and age. (B) Relationship between TREM2 expression and gender. Supplementary Table 1: immune infiltration score. The row is the ID of the sample and the column is the score, including StromalScore, ImmuneScore, and ESTIMATEScore. Supplementary Table 2: differentially expressed genes between high and low ImmuneScore groups. The row is the gene name, and the column is the fold change after taking the logarithm with the base of 2 and the adjusted P value in turn. Supplementary Table 3: differentially expressed genes between high and low StromalScore groups. The row is the gene name, and the column is the fold change after taking the logarithm with the base of 2 and the adjusted P value in turn. Supplementary Table 4: common differentially expressed genes shared by ImmuneScore groups and StromalScore groups. The row is the gene name and the column is the fold change after taking the logarithm with the base of 2. [file 3677789.f1.zip › Supplement Table 1.txt]

ID	StromalScore	ImmuneScore	ESTIMATEScore
TARGET-40-0A4HLD-01A-01R	-182.3487964	-67.78860325	-250.1373996
TARGET-40-0A4HMC-01A-01R	106.8925048	1160.834268	1267.726773
TARGET-40-0A4HX8-01A-01R	-69.9547604	-39.52598371	-109.4807441
TARGET-40-0A4HXS-01A-01R	56.9431787	470.2956813	527.23886
TARGET-40-0A4HY5-01A-01R	137.9298816	173.6622722	311.5921537
TARGET-40-0A4I0Q-01A-01R	659.0671602	317.4772154	976.5443756
TARGET-40-0A4I0U-01A-01R	762.8273864	2423.306777	3186.134163
TARGET-40-0A4I0W-01A-01R	1078.814186	446.3769104	1525.191097
TARGET-40-0A4I3S-01A-01R	479.7725348	-92.64023994	387.1322948
TARGET-40-0A4I3W-01A-01R	294.6919662	-701.5312331	-406.8392669
TARGET-40-0A4I42-01A-01R	-400.5182331	143.941203	-256.5770301
TARGET-40-0A4I48-01A-01R	724.9056242	1013.893598	1738.799222
TARGET-40-0A4I4A-01A-01R	1345.039172	1222.243999	2567.283171
TARGET-40-0A4I4E-01A-01R	280.1344523	-841.393528	-561.2590757
TARGET-40-0A4I4M-01A-01R	910.2456354	1277.120357	2187.365993
TARGET-40-0A4I4O-01A-01R	79.44879827	223.5737882	303.0225865
TARGET-40-0A4I5B-01A-01R	373.998539	1114.225393	1488.223932
TARGET-40-0A4I65-01A-01R	509.8766625	191.4603675	701.3370299
TARGET-40-0A4I6O-01A-01R	475.4468053	-199.1485738	276.2982315
TARGET-40-0A4I8O-01A-01R	1250.862816	482.1854298	1733.048246
TARGET-40-0A4I8S-01A-01R	325.8155302	794.7524817	1120.568012
TARGET-40-0A4I8U-01A-01R	311.6777462	552.8269104	864.5046566
TARGET-40-0A4I9K-01A-01R	233.2281759	495.6293062	728.8574822
TARGET-40-NAAEDA-01A-01R	753.3725564	518.8927522	1272.265309
TARGET-40-NAAEDA-01A-06R	1684.222854	1629.061416	3313.28427
TARGET-40-NAAEDD-01A-06R	-1266.492487	-991.1560527	-2257.64854
TARGET-40-NAAEDH-01A-01R	894.1887774	1685.992759	2580.181536
TARGET-40-NAAEDH-01A-06R	253.181253	913.6295191	1166.810772
TARGET-40-NAAEDI-01A-01R	434.4770558	1058.533493	1493.010549
TARGET-40-NAAEDI-01A-06R	703.2109585	1513.909187	2217.120146
TARGET-40-NAASJI-01A-01R	51.1017257	61.81178828	112.913514
TARGET-40-NAASJK-01A-01R	406.7021707	241.4919131	648.1940838
TARGET-40-PAKFVX-01A-01R	-909.5196949	314.2295818	-595.2901132
TARGET-40-PAKUZU-01A-01R	264.2651534	109.551173	373.8163263
TARGET-40-PAKXLD-01A-01R	-218.6170623	-895.9997617	-1114.616824
TARGET-40-PAKZZK-01A-01R	567.5440323	547.7516437	1115.295676
TARGET-40-PALECC-01A-01R	83.13376589	706.4632168	789.5969827
TARGET-40-PALFYN-01A-01R	1321.510622	1544.893323	2866.403945
TARGET-40-PALHRL-01A-01R	-368.9966658	411.7424311	42.74576535
TARGET-40-PALKDP-01A-01R	-359.1743899	-638.8918091	-998.066199
TARGET-40-PALKGN-01A-01R	695.6044463	926.0588077	1621.663254
TARGET-40-PALWWX-01A-01R	478.4464181	595.5193559	1073.965774
TARGET-40-PALZGU-01A-01R	93.07599642	662.356541	755.4325374
TARGET-40-PAMEKS-01A-01R	572.2470747	-266.8125586	305.4345161
TARGET-40-PAMHLF-01A-01R	605.5234805	66.38260009	671.9060806
TARGET-40-PAMHYN-01A-01R	449.5250147	710.6721281	1160.197143
TARGET-40-PAMJXS-01A-01R	-24.01985072	299.2872442	275.2673934
TARGET-40-PAMLKS-01A-01R	-826.8601617	-559.9358836	-1386.796045
TARGET-40-PAMRHD-01A-01R	208.3629492	672.4668901	880.8298393
TARGET-40-PAMTCM-01A-01R	-389.5638555	-804.9683412	-1194.532197
TARGET-40-PAMYYJ-01A-01R	-41.88686863	312.078361	270.1914924
TARGET-40-PANGPE-01A-01R	453.9169212	438.6325821	892.5495033
TARGET-40-PANGRW-01A-01R	522.0203602	591.645809	1113.666169
TARGET-40-PANMIG-01A-01R	758.1128106	130.1938933	888.306704
TARGET-40-PANPUM-01A-01R	-61.40493413	-392.51979	-453.9247241
TARGET-40-PANSEN-01A-01R	657.723652	44.73692583	702.4605778
TARGET-40-PANVJJ-01A-01R	1062.570789	398.0269684	1460.597757
TARGET-40-PANXSC-01A-01R	365.730675	1325.974975	1691.70565
TARGET-40-PANZHX-01A-01R	720.0707475	1184.270549	1904.341296
TARGET-40-PANZZJ-01A-01R	936.7411414	891.4678764	1828.209018
TARGET-40-PAPFLB-01A-01R	-161.3972789	462.0118383	300.6145594
TARGET-40-PAPIJR-01A-01R	510.9830351	1329.016784	1839.999819
TARGET-40-PAPKWD-01A-01R	-987.1603195	-442.5899236	-1429.750243
TARGET-40-PAPNVD-01A-01R	-638.754963	-379.6386734	-1018.393636
TARGET-40-PAPWWC-01A-01R	-118.9823675	381.2002793	262.2179118
TARGET-40-PAPXGT-01A-01R	431.3339819	1119.138823	1550.472805
TARGET-40-PARBGW-01A-01R	14.24263813	700.5939293	714.8365674
TARGET-40-PARDAX-01A-01R	-489.7584783	-125.6704397	-615.428918
TARGET-40-PARFTG-01A-01R	391.5033601	561.1235587	952.6269188
TARGET-40-PARGTM-01A-01R	-544.7041829	253.0825542	-291.6216287
TARGET-40-PARJXU-01A-01R	594.2199665	-139.8953127	454.3246538
TARGET-40-PARKAF-01A-01R	-142.6078291	243.7845207	101.1766916
TARGET-40-PASEBY-01A-01R	458.4572025	860.617293	1319.074496
TARGET-40-PASEFS-01A-01R	-607.8608851	-1533.340628	-2141.201513
TARGET-40-PASFCV-01A-01R	1429.020488	1397.474275	2826.494763
TARGET-40-PASKZZ-01A-01R	1069.912777	363.013772	1432.926549
TARGET-40-PASNZV-01A-01R	183.9846153	995.2296813	1179.214297
TARGET-40-PASRNE-01A-01R	292.4548237	827.2842735	1119.739097
TARGET-40-PASSLM-01A-01R	-359.3708293	-292.38203	-651.7528593
TARGET-40-PASUUH-01A-01R	-93.64292769	1686.466206	1592.823278
TARGET-40-PASYUK-01A-01R	1600.196208	2423.164127	4023.360334
TARGET-40-PATAWV-01A-01R	346.3338772	139.2825713	485.6164485
TARGET-40-PATEEM-01A-01R	330.9141053	169.7978111	500.7119164
TARGET-40-PATJVI-01A-01R	-48.39611849	889.133073	840.7369545
TARGET-40-PATKSS-01A-01R	-553.9673448	-1012.070729	-1566.038073
TARGET-40-PATMIF-01A-01R	712.753932	1402.499752	2115.253684
TARGET-40-PATMPU-01A-01R	-335.6081925	208.2251045	-127.383088
TARGET-40-PATMXR-01A-01R	-416.8585252	190.3546146	-226.5039107
TARGET-40-PATPBS-01A-01R	195.4425846	688.0978839	883.5404684
TARGET-40-PATUXZ-01A-01R	-410.1460515	-242.7954822	-652.9415337
TARGET-40-PAUBIT-01A-01R	964.086024	312.2689486	1276.354973
TARGET-40-PAUTWB-01A-01R	489.0350512	1157.97341	1647.008462
TARGET-40-PAUTYB-01A-01R	-140.465765	1056.571987	916.1062221
TARGET-40-PAUUML-01A-01R	-514.4776834	-1015.68299	-1530.160673
TARGET-40-PAUVUL-01A-01R	-409.9279457	219.954279	-189.9736667
TARGET-40-PAUXPZ-01A-01R	-138.9680234	-55.1378452	-194.1058686
TARGET-40-PAUYTT-01A-01R	176.9987345	-350.2343995	-173.235665
TARGET-40-PAVALD-01A-01R	-470.8891265	-1188.243657	-1659.132783
TARGET-40-PAVCLP-01A-01R	675.8622101	806.8502177	1482.712428
TARGET-40-PAVDTY-01A-01R	186.6672218	719.7522664	906.4194882
TARGET-40-PAVECB-01A-01R	1078.214555	61.80021816	1140.014773
