# Supplementary material for: TREM2 as a Prognostic Biomarker for Osteosarcoma Microenvironment Remodeling
Source: J Oncol. 2023 Feb 17;2023:3677789. doi: 10.1155/2023/3677789 (PMC9957636; doi:10.1155/2023/3677789)
Supplement: Supplementary Materials — The Supplementary Figures and Tables for this article can be found online at: https://doi.org/10.6084/m9.figshare.21972614.v1. Supplementary Figure 1: the GO and KEGG enrichment analysis. (A, B) The GO enrichment analysis. (C, D) The KEGG enrichment analysis. Supplementary Figure 2: relationship between TREM2 expression and clinical features. (A) Relationship between TREM2 expression and age. (B) Relationship between TREM2 expression and gender. Supplementary Table 1: immune infiltration score. The row is the ID of the sample and the column is the score, including StromalScore, ImmuneScore, and ESTIMATEScore. Supplementary Table 2: differentially expressed genes between high and low ImmuneScore groups. The row is the gene name, and the column is the fold change after taking the logarithm with the base of 2 and the adjusted P value in turn. Supplementary Table 3: differentially expressed genes between high and low StromalScore groups. The row is the gene name, and the column is the fold change after taking the logarithm with the base of 2 and the adjusted P value in turn. Supplementary Table 4: common differentially expressed genes shared by ImmuneScore groups and StromalScore groups. The row is the gene name and the column is the fold change after taking the logarithm with the base of 2. [file 3677789.f1.zip › Supplement Table 2.txt]

gene	logFC	fdr
PRUNE2	-1.41666836	0.004479097
MMP9	1.034713637	0.01170177
AOAH	1.555700425	4.01E-06
GPLD1	-1.710565823	0.047219966
CCDC58	-1.331419268	0.027631069
IRAK1BP1	-1.256544702	0.008784358
DCAF8L1	2.933129086	0.006477789
RGPD8	-1.113833711	0.001058067
SNCB	-2.291138611	0.0207191
CXCL10	2.354527071	1.41E-05
CSDC2	-1.288658239	0.04791675
C1orf162	2.009899516	3.48E-10
AMOTL1	-1.029806583	0.001285409
OCLM	-1.063163564	0.007929962
C3AR1	1.2882629	6.10E-07
FCER1G	1.545533817	3.13E-09
RAB3B	-1.522991493	0.047219966
SEMA6C	-1.129259219	0.019530644
C2CD3	-1.094447595	0.00071336
CCDC122	-1.014213423	0.009496079
ZNF385C	-1.746357108	0.014012253
S100A8	2.463138563	4.01E-05
NLRP3	1.410740916	4.83E-07
SRCIN1	-1.086968463	0.030862219
PDZK1	-1.042207653	0.012819284
MFNG	1.001976291	3.65E-06
CD53	1.47362316	1.97E-09
PPIL6	-1.650013956	0.004631519
IGSF21	1.416521035	3.38E-06
ITGAM	1.165633204	5.23E-06
GPR156	-1.197506314	3.39E-05
CA9	-1.667243325	0.023912494
CIART	-1.160517431	0.011878011
SLC22A18AS	1.010242438	3.91E-05
ADAM21	-2.093559862	0.019258665
IL1RN	1.318289033	0.000452092
MCHR1	-1.587406008	0.008636447
PABPC3	-1.0502294	0.006725299
ANPEP	1.040519584	0.000138865
PSIP1	-1.026338137	3.46E-06
CYBB	1.736561042	1.50E-07
ACVR2B	-1.128617225	0.010646189
PRSS21	2.009390858	0.021574292
CMPK2	1.347919064	0.021052285
CD27	1.386733727	0.029560759
MIPOL1	-1.079025331	0.041322642
OR4D9	-1.020942514	0.049770215
GNG14	-1.485294741	0.027040088
MYO3B	-1.714228668	0.015959195
VNN2	1.057749737	0.001487483
C9orf135	-1.347363339	0.042403809
CST3	1.043117195	0.000284033
CACNG2	-1.85465877	0.046006971
TREM1	1.124176888	0.026145572
PCDHGB1	-1.097446447	0.034063489
SOX17	1.002783046	0.000404086
BATF2	1.38630627	0.001304889
SPTB	-1.050495918	0.046625226
TMPRSS5	-1.988373787	0.049176839
EMX1	-2.995585363	0.020403923
PIEZO2	-1.22509299	0.020403923
ZIC4	-1.413411286	0.012383523
PRKAB2	-1.056060044	0.000452092
SIGLEC7	1.557458752	1.01E-07
DCUN1D3	-1.90115662	0.036481915
LPAR3	-1.061891779	0.009650294
EPB41	-1.08617557	0.000925495
ZC3HAV1L	-1.12713244	4.88E-05
PTPN6	1.636287161	3.48E-10
COMP	-1.311700893	0.043099205
SIGLEC1	1.778823709	3.65E-08
XKR5	-1.333657994	0.038026375
ZIM3	-1.18009796	0.013626824
WDR43	-1.530984369	0.009496079
ADH6	-1.873076669	0.027631069
FLG	-1.90177213	0.001523653
ZAP70	1.150745875	0.001304889
MAP3K15	-2.073244444	0.000176798
MYO5C	-1.085793183	0.035023872
GAREM1	-1.163895949	0.033605726
TMEM239	-1.150248409	0.044915293
CCR5	1.666243792	6.29E-06
PTAFR	1.168973776	1.21E-06
C3	1.198601583	0.015959195
NCMAP	-1.177821482	0.046006971
AC008878.1	-2.077270708	0.039651709
TRPC4	1.032270476	0.003062441
TMPRSS12	-1.037404478	0.004631519
ARID3B	-1.991048951	0.034063489
IFI27	1.454717822	0.000904007
CLEC3A	-2.570259899	0.007465029
LRP8	-1.03096654	0.00024487
TSTD1	1.334768152	0.001815522
ABHD12B	-1.27841685	0.006477789
DNAH10	-1.050959244	0.009650294
CD160	-1.040702887	0.032598928
AQP11	-2.063795132	0.045467933
FCGR1B	1.216407644	9.83E-06
CAMK2A	-1.502929456	0.01221896
ALOX5	1.205524065	7.94E-06
SIRPG	1.396432217	0.000308018
LY96	1.015840719	1.29E-06
PSG5	-1.316518497	0.036481915
BCL2L10	-1.153627364	0.01658014
TNN	-1.371814955	0.038026375
RGS1	1.854368208	0.005963025
PGBD4	-1.895553995	0.023912494
NCR3	1.022385925	0.008636447
PPBP	1.452025352	0.004747948
MYOG	-2.543232891	0.029560759
PRLHR	-1.548016206	0.024997683
CSF1	1.15351872	2.38E-05
LCP1	1.194823639	1.52E-06
GUCY2C	-1.059353936	0.033605726
MMS22L	-1.062193873	5.76E-05
FAM180A	-1.103069028	0.024997683
SNCG	1.243296119	2.85E-05
FRMPD3	-1.515484711	0.031937939
TLR2	1.035219084	0.000213871
GSG1	-1.091652642	0.025367495
FGF11	-1.326670631	0.037507798
BEND5	-1.303292532	0.001500025
KIF12	-2.852548191	0.007792688
CD52	1.888591355	1.21E-05
MS4A4A	1.659307062	3.43E-09
C17orf107	-1.246547351	0.010138026
ANKRD62	-1.463766611	0.033605726
OR5AS1	-1.309991233	0.022921808
GABBR2	-1.588726688	0.041920176
GPR84	1.353076584	3.54E-06
CD3E	2.35911371	2.76E-06
ZNF462	-1.463600411	0.003062441
PCDH9	-1.241531304	0.007465029
ZMYND15	1.050516366	3.85E-05
GOLGA8Q	-1.000134977	0.01564611
SLC2A1	-1.133163349	0.012819284
EPPK1	-1.326879446	0.007564399
CD37	1.2183528	5.70E-06
OR2AG1	-1.074982199	0.036028082
BEGAIN	-1.290314503	0.028769647
GHRHR	-2.264944432	0.008970345
ALPK2	-1.814935715	0.027631069
STAC2	-2.484506902	0.013013707
FCGR1A	1.657890696	6.48E-09
ADAM11	-1.520940221	0.010303042
ASAH2	-1.016121262	0.004631519
BEND2	-3.011281062	0.007363627
CLECL1	1.668538242	7.56E-07
GFAP	-1.093085402	0.003629589
AL096711.2	-1.531257659	0.007116205
PTCHD1	-1.793905721	0.023598605
HBA1	2.346997176	0.005134247
TUFT1	-1.397812291	3.59E-05
ADORA3	1.342867294	0.000158178
PHYHIP	-1.254105008	0.006390537
IQCM	-1.276249571	0.027631069
DCSTAMP	1.066317414	0.005963025
ALOX5AP	1.667694432	1.40E-07
NAT16	-1.230918845	0.030862219
GPR65	1.433034483	6.29E-07
TMEM212	-1.135627479	0.035023872
ELOA3	-2.205255181	0.027866764
SRGN	1.554228338	1.69E-07
SIGLEC5	1.529449338	6.42E-05
DMRTA1	-1.180781275	0.046401693
TIGIT	1.548732159	0.004903178
KLHL10	-1.467525968	0.016000455
CD300LF	1.0588084	5.94E-05
CCL18	1.950323407	0.015678379
C12orf71	-1.994774862	0.045886604
HLA-DMB	1.484971681	1.88E-08
C1QB	2.166421287	7.72E-10
KRT80	-1.277337671	0.037050359
ERO1A	-1.124386822	0.014012253
CD79A	1.865352627	0.007792688
RAP1GAP	-1.0229172	0.026471553
HLA-DQB2	1.477803132	0.001328037
NPL	1.021012218	8.14E-06
CYP3A5	-1.024000682	0.001126511
ADGRD2	-1.284043824	0.00228092
SPATA4	-1.073686675	0.046625226
OCA2	-1.939640921	0.027631069
CXCR6	1.836301647	0.000234217
SOWAHD	1.015616742	0.00024487
SPATA6L	-1.266183515	0.030862219
CD28	1.138146793	0.000637754
GRM1	-1.296840674	0.015959195
TEX36	-1.536748996	0.022921808
CRHR1	-2.690255016	0.03869672
LDHAL6A	-1.009996561	0.049770215
AIRE	-1.431113899	0.008377303
HNF1A	-1.441106208	0.017567707
FSIP2	-1.351901491	0.027297725
JAML	1.424933363	2.44E-05
OSM	2.082226194	6.22E-06
FCGR2A	1.237169106	5.50E-07
FSIP1	-1.856416245	0.008377303
PSMB9	1.170373879	1.45E-05
FBXO21	-1.000016027	7.57E-05
ZG16B	1.099020931	0.003388836
SSX2IP	-1.485581062	0.000234217
IGFBP5	-1.12319192	0.018411245
ONECUT2	-1.506190381	0.04023636
VAMP8	1.545351327	1.97E-09
ATAD2	-1.113743303	0.013013707
CD74	1.74113264	6.85E-09
OR8D4	-1.487047369	0.018971922
EMILIN3	-1.629933227	0.04023636
PTGES3L	-1.018116298	0.0016788
OR10K2	-1.392414035	0.02349318
SCML2	-1.193082354	0.014193311
ARHGDIB	1.289183277	4.59E-10
CASS4	1.001579508	0.009496079
NODAL	-1.017349539	0.037368735
GPR55	1.224793099	0.00206805
CSF2RB	1.104446985	1.70E-05
PRRG3	-1.004155521	0.012819284
GIMAP7	1.464761539	5.50E-07
OR2A25	-1.074196427	0.048580077
FASLG	1.738084473	0.001623894
CD300A	1.195470551	1.09E-06
C3orf70	-1.216680231	0.004119334
IL10RA	1.344574763	3.67E-07
IQCH	-1.028124211	0.00228092
TPD52	-1.274659099	0.009650294
SUCNR1	1.069289225	0.000195962
ANK2	-1.824340573	0.003337444
LRP2BP	-1.585147505	0.004631519
RNASE10	-1.101444916	0.01170177
CLEC3B	1.094256048	0.0003638
MKX	-1.075354778	0.043099205
GPSM3	1.279513874	7.40E-08
OR8G5	3.155429049	0.03124742
PTPRCAP	2.539337491	1.06E-05
PPFIA4	-1.795361941	0.000420399
TTLL9	-1.373161157	0.017165022
LAG3	1.67452025	1.14E-05
FAM9C	-1.085237504	0.000536344
HLA-DMA	1.544264935	1.02E-09
MTRNR2L3	-1.02953508	0.010198961
C6orf226	1.001193033	0.002442902
TCF7L2	-1.790873413	0.022284885
WNK2	-1.067670791	0.031258865
CCDC188	1.120639398	0.028769647
DOCK2	1.107247039	1.37E-06
AC091167.6	-1.158398331	0.036335862
PRSS56	-1.98843925	0.040883273
OR1A1	-1.159234066	0.031652736
RNASE1	1.670685118	2.04E-08
TNPO2	-1.061557587	0.000524087
CD48	1.429849833	2.95E-07
RNF150	-1.487478459	0.005398857
TNFAIP8L2	1.313474264	6.60E-08
CCR2	1.606590084	0.000485342
GIMAP5	1.696552776	1.20E-08
DEFB131B	-1.509933145	0.002948063
TPH2	-1.011054073	0.043099205
NAALADL2	-1.409072521	0.003775314
MS4A1	1.347936997	0.028650166
POTEG	1.524260399	0.049770215
C1QTNF3	-1.954275678	0.011523457
FOLR2	1.430771233	1.29E-07
PKDREJ	-1.009454923	0.016118683
CD2	2.00144462	0.000186638
ARHGEF26	-1.925932011	0.010814934
SLC6A3	-3.747850895	0.032824812
HCST	1.969432885	1.42E-09
CEP70	-1.088164266	4.79E-05
PCDHGC4	-1.908548214	0.001266397
SLC9A3	-2.43176854	0.034579678
HLA-DQA2	1.663292076	0.003227318
ST14	1.242963813	3.77E-05
BHLHA15	-1.325609386	0.043680182
ANKS4B	-1.744684237	0.033605726
CFAP61	-1.247798189	0.021336972
LRRC36	-1.331923735	0.046625226
RASGEF1A	-1.685821919	0.0016788
ZFR2	-2.406358607	0.045467933
ICOS	1.638671587	0.002319085
TLK1	-1.374584611	0.004479097
LTC4S	1.159896024	0.000116878
GPR37L1	-1.063963748	0.007252419
GNAZ	-1.011110818	0.011357866
BNIP3	-1.242848148	0.000153938
TRIM72	-1.87362309	0.02995657
CASP1	1.247754641	4.50E-07
ZNF724	-1.017371433	0.001815522
NPTX1	-3.824515614	0.004190959
BCL2A1	1.414462977	0.000113747
BMX	1.139373366	0.015959195
CHDH	-1.114182395	0.002117077
SLC6A11	-1.976298082	0.021336972
ALDH1L1	-1.055095511	0.018683254
LRRC2	-1.733191045	0.001815522
IGSF11	-1.187347924	0.013013707
CLEC4A	1.115324327	0.000586269
PHACTR3	-1.42253866	0.007116205
PDE11A	-1.08511467	0.013237771
VSIG4	2.236229987	1.74E-08
SLC22A25	-1.217323763	0.023912494
FAM76A	-2.108116517	0.002082288
CD8A	1.596157266	0.004119334
IL27	1.526872185	3.31E-06
CTSS	1.279066712	1.04E-05
HLA-DRA	1.601688853	3.25E-08
PDPN	-1.326899816	0.033154062
CCR1	1.147955193	1.21E-05
GPR83	-1.04242326	0.029560759
EPPIN	-1.225150908	0.041920176
ADA2	1.304093082	5.61E-05
BAIAP2L2	-1.159549226	0.047219966
CCL3	1.803592773	4.47E-06
CRHBP	1.023807847	6.06E-05
DZIP1L	-1.131067153	0.011357866
KIAA1958	-1.166342693	0.002040033
ROPN1B	-2.395247953	0.016430384
CDA	1.136620053	0.000322169
RAB11FIP4	-1.085811763	0.015959195
UTS2	1.354423948	0.028397816
SIGLEC12	1.378087166	0.008891835
CD40LG	1.391547186	0.000830707
CD5	1.431042596	0.000414252
SH2D4A	-1.275159495	0.000814753
MYH7B	-1.186303063	0.025367495
MRLN	-1.471440565	0.004119334
LAIR2	2.363096368	0.001071365
ERCC4	-1.418162794	0.003227318
CX3CL1	1.067134836	0.001166808
ZC3H12B	-1.003027768	0.008224167
ADPRHL1	-1.460666705	0.004051973
FMR1	-1.832930839	0.026900643
BCL11B	-1.829230723	0.015336043
LAPTM5	1.173817084	1.91E-06
KCNC4	-1.075497351	0.007363627
STK26	-1.032989945	0.004903178
PAK3	-1.575821316	0.008224167
TMIGD3	1.504480893	1.01E-05
CDH9	-1.502530479	0.049709028
DCHS2	-1.650199236	0.015553784
ZNF699	-1.107339589	0.000315008
CACNG4	-3.018747842	0.022284885
CTSV	-1.349162171	0.028007899
GALNT16	-1.349377694	0.007024352
TMEM150B	1.40602382	3.67E-07
ROPN1	-2.489518028	0.024238307
CCL14	1.296250452	0.007024352
OR14J1	-1.198680633	0.014193311
CXorf67	1.738217213	0.0162104
TRIM29	-1.596066245	0.004970106
MEIOC	-1.119896889	0.012383523
CD14	2.131312448	5.07E-10
EDN2	-3.624514128	0.033749152
TEX9	-1.154635033	0.001166808
CBS	-1.033711729	0.017873351
RNASEH1	-1.049491787	0.02995657
FYB1	1.059845559	0.001077488
FCER2	1.190333602	0.023912494
HEATR4	-1.05442221	0.01482129
MS4A14	1.133821711	0.000116878
UBD	2.490996096	0.007792688
IGLL5	1.079864438	0.001576585
PSTPIP1	1.034241455	0.000254851
S100A1	-1.99659036	0.031258865
HLA-DQB1	1.688229471	5.50E-07
TNFSF10	1.232333979	6.06E-05
RTP4	1.300084219	4.88E-05
GCGR	-1.896364162	0.047219966
GPR142	-2.11706013	0.01661271
KLHL33	-1.062854956	0.023912494
CCL4	2.260051775	3.67E-07
MED13L	-1.015852532	1.25E-05
CLCN5	-1.179861923	0.000904007
IGF2BP2	-1.024369384	0.031258865
PPM1E	-1.091871888	0.004970106
CACNA2D1	-1.151530977	0.017399482
SPI1	1.362728869	1.65E-07
MUC17	-2.512786252	0.030862219
ZNF713	-1.137301204	4.01E-05
APOC1	1.230241927	0.000127176
C2orf83	-1.552487309	0.016430384
MNS1	-1.318973548	2.38E-06
TET1	-1.684235014	8.14E-06
EML6	-1.094274648	0.01221896
DEK	-1.007129688	0.001928255
INPP5F	-1.584318354	0.014393841
EYA4	-1.116027198	0.025367495
CCDC169	-1.060218699	0.009650294
CD300E	1.058826933	0.000726816
LYZ	1.657683777	1.87E-05
MPEG1	1.672666777	2.28E-08
SPATA8	2.257980569	0.020261693
USP27X	-1.650952598	0.038588891
RNF43	-1.222170213	0.045467933
SPSB4	-1.504542682	0.014586586
HLA-DPB1	1.395560757	2.87E-07
LCLAT1	-1.100702421	0.000547896
CCDC74A	-1.23538352	0.003775314
CXCR5	1.047012557	0.022566628
OR4K13	-1.069816682	0.041322642
SPIN2A	-1.196068817	0.0207191
AGMO	1.005047477	0.04249606
S1PR4	1.465688969	0.000942039
HK3	1.30027873	5.50E-07
JPH1	-2.69528497	0.017873351
CLEC18A	-1.769452062	0.003171279
XCL2	1.548966546	0.001052456
SLX4IP	-1.037319364	0.017649686
CCL24	1.203071569	0.043966709
XK	-1.212803067	0.005321286
LILRA1	1.593453529	2.17E-06
CLEC10A	1.449942436	0.000485342
CDON	-1.319563397	4.27E-05
IL5RA	-1.638994804	0.031258865
NKX3-2	-1.634618357	0.007116205
ZNF460	-1.195203481	0.000172071
STAG2	-1.414481924	0.004716174
ERBB3	-1.672678002	0.023912494
MBOAT1	-1.094626724	0.01221896
SLC25A41	-1.188004369	0.044640387
PRF1	1.675540492	0.00020815
PRSS42	-1.140121848	0.006815571
VSIG10	-1.207597812	0.007465029
HYDIN	-1.548959863	0.002401711
TMEM47	-1.049712807	0.010814934
SYDE2	-1.041707338	0.000668176
CXCL9	3.053858812	0.014193311
TMEM176B	1.718097506	2.98E-08
IL2RG	1.112153488	5.03E-05
GIMAP1	1.4090289	4.19E-08
OR6J1	-1.061349805	0.018411245
CD209	1.756614622	3.25E-08
SOWAHA	-2.409940497	0.0188625
HSPB6	-1.194919379	0.025367495
DDIT4L	-2.58340997	0.04023636
CSF3R	1.045699842	0.000536344
NCCRP1	-1.312291428	0.001328037
PRKG2	-1.552656671	0.045879704
TLR8	1.525682988	9.97E-07
AC069368.1	-2.236496971	0.023598605
HSD17B13	-1.256580043	0.004314301
TRIM9	-2.163324474	0.005585805
GNLY	1.243249945	0.001410454
KIAA1328	-1.079542493	0.022587269
P2RY10	1.250089854	0.005830953
OPRD1	-2.089402038	0.01482129
SP9	-2.698296218	0.0169223
DUSP19	-1.141298228	0.003227318
ESPN	-2.132196956	0.002242995
HBM	3.475763365	0.014100129
TRIM59	-1.040225329	0.005963025
RNF223	-1.004813301	0.003388836
ANKRD36C	-1.010091257	0.00119036
WNT10B	-1.044516601	0.013626824
KLRB1	1.550083856	0.000478762
GRAMD2A	-1.653860639	0.002748533
TNFSF12-TNFSF13	2.619673806	9.49E-05
IGF1R	-1.280242469	0.007024352
SELPLG	1.090811675	2.24E-06
PPP1R3G	-1.013587597	0.017649686
OR7A17	-1.205386203	0.028397816
CKMT2	-1.050873179	0.005488085
PF4V1	1.045491501	0.036335862
LCA5L	-1.003336953	0.010646189
ADAMDEC1	1.016495462	0.010138026
PCDHGB3	-1.39950104	0.045467933
DAAM1	-1.043614493	0.001523653
TLR4	1.04908451	0.000100579
KLF8	-1.009185913	0.039651709
OR2AT4	-1.232989831	0.028769647
CXCL2	1.001265447	0.023598605
FCGBP	1.06445928	0.008094136
SLCO5A1	-1.281899171	0.016689188
LILRB1	1.137936248	2.04E-06
CXCL3	1.113837904	0.003816536
MCOLN3	-1.232421392	0.031258865
WAS	1.484917597	1.42E-09
SCRG1	-2.166129582	0.009802614
COL2A1	-2.788771354	0.023598605
CLDN19	-1.483277886	0.026900643
HIST1H3D	1.41615043	0.027197967
AL365232.1	-1.224514718	0.048822974
GRIN2B	-1.705283431	0.020119258
TCIM	1.143272908	0.012383523
CYP2S1	1.005451706	2.94E-05
GPIHBP1	1.407806009	0.000105509
C1QL4	-1.562822876	0.044915293
AIF1	1.927952882	3.48E-10
LIPG	-2.004894114	0.002082288
ITGB2	1.544211774	5.00E-09
FANCD2	-1.258700108	0.022587269
BLOC1S5-TXNDC5	-2.410512243	0.018411245
TYROBP	1.765632631	1.42E-09
ACY3	1.616811486	0.028769647
TTLL7	-2.349778516	0.049770215
GIMAP8	1.148580086	2.52E-07
LILRB2	1.850006728	1.07E-09
ESYT3	-1.073777326	0.010646189
C1QA	2.273947555	3.48E-10
RUFY4	1.19172716	0.005678412
SLCO2B1	1.29844856	1.63E-07
IL1B	1.501727959	0.000461671
TTLL5	-1.211171125	0.016430384
FCN1	1.941311777	0.000203631
NEUROD1	-1.064602481	0.049770215
APOBR	1.19559452	2.52E-05
C19orf67	-1.841717982	0.008486871
ZNF556	-1.521524015	0.043680182
SIGLEC14	1.366513421	0.001077488
RANBP17	-1.007219157	0.017873351
B3GAT2	-1.202000199	0.020119258
AC010422.3	1.358290237	0.000499461
ASCL5	-1.028249216	0.015109825
SLC29A2	-1.055691287	0.047219966
TFEC	1.243824993	4.88E-05
CARD11	1.140960019	9.52E-06
CSF1R	1.135144188	1.28E-05
LY86	1.617516533	2.67E-08
TRIM36	-1.331925111	0.013626824
GREB1L	-1.342258545	0.040607452
OR5H1	-1.693192931	0.007252419
WWP2	-1.185126376	0.007929962
STAB1	1.577104419	5.89E-08
IFIH1	1.154327783	0.043099205
CORO7-PAM16	1.108670166	0.016058851
KLHL23	-1.144421031	0.003273995
ZBED6	-1.46032642	8.02E-05
FCGR3A	2.219402409	1.63E-08
PCDHGA8	-1.141247025	0.024662013
RYR3	-1.022570647	0.00935326
AHRR	-1.568259252	0.027631069
SNX20	1.47060372	5.02E-09
NKG7	2.097040804	3.02E-05
FAM240A	-1.590694329	0.049598746
CD247	1.347363786	0.005321286
G0S2	1.013565275	0.015959195
TREM2	1.326696907	6.29E-06
GIMAP6	1.094846597	6.29E-06
VWF	1.096248834	0.003388836
GZMH	2.240648305	0.001163479
GDNF	-1.348332152	0.024662013
TBC1D19	-1.061343916	0.00935326
OR10H5	-1.187719118	0.036028082
IL2RA	1.821621818	4.24E-07
GPR12	-1.934611192	0.013976644
MAST1	-1.358194591	0.002796284
ZBTB8B	-1.4133713	0.043099205
TRIM45	-1.076521606	0.002117077
GRM3	-2.02983597	0.013412063
TBR1	-1.422714973	0.018683254
CACNA1G	-1.618367289	0.005134247
CDK12	-1.151798972	0.00071336
SIX4	-1.093605108	0.002363553
AKNAD1	-1.138154663	0.003337444
CLEC18C	-1.955003783	0.009650294
FNDC8	-1.64236225	0.037595601
USH1C	-3.494374874	0.01613007
LTB	2.49131172	8.91E-07
PDE6A	-1.026793816	0.0169223
OR2T12	-1.240907248	0.007693393
LILRB4	1.314627206	1.36E-07
SLC15A3	1.273045015	6.93E-09
IDO1	1.698423283	0.008784358
CD69	1.78485148	0.001285409
KCNJ11	-1.455259361	0.030862219
CDH23	-1.925861914	0.005585805
NKD1	-1.091975831	0.026471553
C10orf71	-1.93833333	0.024519069
CCL15-CCL14	1.996021904	0.00395967
MLANA	-1.006484143	0.013626824
PGAP1	-1.117008795	0.000167468
LTA	1.242318325	0.008891835
MYZAP	1.016667864	0.02197332
GLI1	-1.046041806	0.022284885
GPBAR1	1.866574802	6.76E-07
CFAP54	-1.201823841	0.005879306
LCP2	1.343490101	4.55E-09
CLEC4G	1.521503601	0.003273995
LAMA1	-1.993447399	0.014393841
PDK1	-1.467132168	5.76E-05
PRKCA	-1.006380917	0.00269935
DDN	-1.484850838	0.000904007
FLNC	-2.094575729	0.0169223
IKZF1	1.236840051	6.22E-06
KLHL11	-1.139216414	3.39E-05
XDH	-1.721790412	0.005235206
ARG2	-1.176433399	0.017873351
LST1	1.63066564	2.25E-09
VXN	-1.70518025	0.015336043
MUSK	-2.094886813	0.019025409
TRPM2	1.173422594	2.56E-07
AK4	-1.167541117	0.008784358
ASCL2	1.229001469	6.70E-06
RGS18	1.376809849	4.95E-06
SNTG1	-1.265790245	0.042304477
EEF1A2	-1.84176667	0.031652736
HCK	1.046494677	5.50E-07
MNDA	1.595465195	1.03E-06
CCL2	1.825318062	3.36E-07
OR10K1	-1.034838953	0.01482129
AUTS2	-1.087643998	0.003629589
HNRNPL	-1.177332082	0.010814934
FCGRT	1.024047656	3.65E-08
ZNF704	-1.057618405	0.022921808
NMD3	-1.618940271	0.010814934
MS4A6A	1.660694468	5.00E-09
LGALS12	1.150844468	0.013976644
AC025165.3	-1.109678896	0.035553617
EFCAB7	-1.249651301	2.77E-05
VTCN1	-2.389577526	0.037507798
COL4A3	-1.656191594	0.007363627
OR2A12	-1.002107392	0.048580077
TMEM184A	-1.430646681	0.019530644
NFIX	-1.669522647	0.003002076
ARHGAP9	1.423151573	1.85E-08
SLC35D1	-1.009214597	0.000701342
NHLRC2	-1.121883633	9.79E-05
IL10	1.709501126	9.48E-05
BARX1	-1.632027888	0.0207191
RPS6KA5	-1.108801107	0.005321286
HK2	-1.039500201	0.007792688
SLC19A3	-1.157415285	0.020119258
NCR3LG1	-1.029076787	0.000340773
CCRL2	1.083890461	3.36E-07
ARHGAP4	1.02363685	1.87E-05
DOK2	1.135470792	1.65E-07
AC068775.1	1.609410979	0.022094794
CORO1A	1.411666491	1.65E-07
C1QC	2.13311438	3.48E-10
MYO1G	1.296553487	1.92E-05
FAM19A5	-1.660751011	0.020403923
APOC2	1.448011954	0.000138865
NT5DC3	-1.676874164	5.23E-06
BTBD8	-1.036695798	0.024519069
F5	1.057630963	0.007792688
SOX6	-1.714201155	0.000234217
LILRA6	1.022788047	0.000186638
KLRC4-KLRK1	1.123914249	0.003500158
DOK7	-1.492498993	0.005963025
JCHAIN	2.993206425	0.044258508
CD3D	2.388687389	1.28E-05
CCL8	2.405492312	7.93E-08
PYCARD	1.336156646	5.08E-09
ZNF461	-1.163104014	0.01221896
CACNA1B	-2.301572585	0.009143249
PIK3AP1	1.121862349	3.54E-06
MAPKBP1	-1.537993078	0.017165022
MAGEB2	4.096708945	0.013169096
TMEM176A	1.502855182	5.19E-07
ZNF683	2.171046211	0.003500158
SLC9A4	-1.200172161	0.034063489
SRRM4	-1.18608979	0.043099205
SASH3	1.619422518	2.98E-08
EBI3	1.563525039	7.74E-06
PAGE1	3.145646566	0.022587269
ALG1L2	-1.105788212	0.008891835
CA12	-1.479935029	0.02995657
PCED1B	1.326736024	1.54E-07
WFDC8	-1.691075935	0.02249137
CFI	1.008239518	0.001615495
RNASE6	1.424851371	4.69E-08
WDFY4	1.275705681	1.29E-06
TLR7	1.069152115	0.000120462
KIR2DL4	1.424864115	0.024108139
DEFB133	-1.013573705	0.022187174
MUC1	-1.129927807	0.027297725
ANKRD22	1.466186591	0.000240064
COLGALT2	-1.60796652	0.000141876
NIM1K	-1.022435884	0.019832379
IL17RB	-1.094721039	0.002748533
MTRNR2L5	-1.386902811	0.016155296
AC091551.1	-1.100669897	0.040023235
ZDHHC22	-1.589979158	0.044070116
S100A9	2.583092992	2.56E-07
HLA-DQA1	1.359782996	3.91E-05
FPR3	1.53946223	4.50E-07
LRRC25	1.427083534	2.01E-08
AHNAK2	-1.298038926	0.014393841
DEF6	1.228175065	1.09E-06
IFITM1	1.074656308	0.003171279
IFI30	1.213309405	1.13E-06
TNFSF8	1.12775163	0.00013067
IRF8	1.072047443	0.000111391
COL9A2	-1.543662664	0.017873351
CHD5	-1.819507032	0.010303042
DPF3	-1.234550007	0.017165022
NCF4	1.677428397	1.45E-09
RBP7	1.092551202	0.000195962
INSYN2	-1.513673433	0.012607326
ZNF711	-1.047022649	0.003840384
ARHGAP32	-1.002247244	0.012383523
OR5A1	-1.174785239	0.019832379
BACH2	-1.234609695	0.005585805
ZNF709	-1.017949086	0.006725299
RORA	-1.532507292	0.000420399
TDRP	-1.131415875	0.025779684
CNKSR2	-1.701370685	0.004970106
GZMK	1.122824461	0.001029213
ABTB2	-1.473554826	0.0207191
TNFRSF13C	-1.12852205	0.041920176
MTRNR2L8	-1.699976971	0.024273788
CWH43	-1.8162854	0.045467933
SLC30A3	-1.122800842	0.033605726
SCX	-1.127487913	0.018411245
HMOX1	1.325721267	0.005488085
LGALS9	1.459561563	7.01E-09
RARRES3	1.285039458	7.57E-05
RNASE2	1.177098979	0.001928255
CXorf21	1.265755488	1.52E-06
NANOG	-1.153695481	0.018971922
LPAR5	1.267215614	2.17E-06
SIM2	-1.564938284	0.014193311
ZNF385B	-1.727680176	0.023912494
CHRM4	-1.061668238	0.013156629
CEACAM21	1.083436037	1.36E-05
GRHL3	-1.31789183	0.038372534
FERMT3	1.234744268	1.36E-07
CALHM6	1.44896231	5.03E-08
HBA2	2.937735726	0.006911409
ADAP2	1.1209671	5.39E-06
APOE	1.315380046	4.68E-05
FAM90A1	-1.22530508	0.027297725
OR4F15	-2.221826882	0.035869633
RIPPLY3	-1.64594686	0.005321286
PLD4	1.088919188	0.006602989
PYGL	-1.079481924	0.001328037
CCDC144A	-1.197173154	0.007564399
OR7G2	-1.077354484	0.018683254
GNA15	1.353318218	2.16E-07
OR4F17	-1.480127495	0.017649686
AC109583.3	-1.227054638	0.034063489
P4HA1	-1.069425507	0.000645094
FRG2C	-1.668418441	0.015553784
CASZ1	-1.107903587	0.047219966
PMP2	-1.571829704	0.012062214
IFI6	1.300280154	0.001077488
AC243547.3	-1.072981044	0.012770642
FGL2	1.363231055	9.08E-05
HBG1	4.223618349	0.045467933
ALDOC	-1.089826495	0.041920176
HLA-DPA1	1.551631508	3.36E-07
APOBEC3A	1.210232723	0.020119258
IGSF9	-1.618256756	0.029560759
RNF113B	-1.42509345	0.010244366
MARCO	2.068665331	0.00646193
LCOR	-1.352220893	0.00046696
PRPH	-2.106672352	0.024997683
TMEM120B	-1.000122564	0.007792688
ACSM2B	-1.026430794	0.0162104
JPH3	-2.266981556	0.017578028
LRRC19	-1.199680883	0.004970106
GPRC5A	-1.309542044	0.017399482
GJA5	1.252384112	0.012383523
FOXL2NB	-1.384603175	0.011878011
RND2	-1.158681839	0.008094136
GIMAP4	1.378399165	1.63E-08
SCD	-1.102090738	0.02197332
RIT1	-1.16228906	0.004479097
CPEB1	-1.548878744	0.046006971
NEB	-1.361015825	0.01170177
CACNA1A	-1.087378586	0.019530644
FPR1	1.37888847	0.000146205
MT3	-1.131307401	0.027402842
MS4A7	1.312915134	5.23E-06
SLAMF8	1.607158853	4.09E-08
EVI2B	1.06366484	3.49E-05
NLRC4	1.045353803	3.46E-06
PCDHB1	-1.557476125	0.036481915
NRK	-2.204748879	0.003629589
CCKAR	-1.972121872	0.039728267
TNFRSF6B	2.44795874	0.043680182
SLC10A4	-1.009457643	0.049176839
ARHGEF4	-1.368273617	0.008636447
TNF	1.442235294	0.001150341
PRAMEF13	-2.485287675	0.032383573
GPR174	1.488174472	0.001204684
DLEC1	-1.279920238	0.008891835
ZNF521	-1.144989756	0.007929962
CXCR3	1.626430334	0.000105509
SOX9	-1.307624042	0.013626824
SHISA9	-1.288614735	0.036028082
CAMK2B	-1.575471296	0.019832379
NEUROG2	-2.343779573	0.001895122
TNFSF13B	1.441190781	6.10E-07
ZSWIM5	-1.239211743	0.010814934
ENHO	-1.091549031	0.004903178
SIGLEC9	1.108382079	1.50E-05
PKD2L1	1.259027489	0.014130683
DENND1C	1.128411043	5.84E-06
NKAIN1	-1.317080837	0.029178268
CFAP69	-1.018803939	0.021052285
BVES	-1.227299643	0.004246062
PLEK	1.442396944	3.65E-08
TYMP	1.403457638	1.20E-08
COL27A1	-1.660580721	0.009802614
NANOS1	-1.803777846	0.000176798
P2RY6	1.371734668	6.50E-06
GRM4	-1.800841932	0.005963025
SAMSN1	1.512928195	3.77E-06
GPR157	-1.058223293	0.001615495
PDE4C	-1.07951525	0.022587269
CD1C	1.368021236	0.02995657
NCF1	1.16254757	1.98E-05
FUT7	1.932650137	2.98E-08
HBB	2.176830627	0.018971922
KIF21A	-1.186235668	0.018411245
AL513165.2	-1.980526235	0.001029213
VMO1	1.530025526	3.39E-05
LILRB5	1.299219501	1.14E-05
RTKN2	-1.068582667	0.031258865
HHLA1	-1.219038691	0.0407904
GZMA	1.755485391	1.08E-05
COCH	-1.54552043	0.019530644
ACSM6	-1.020095994	0.041322642
USP2	-1.140388905	0.000420399
PKP1	-3.171772067	0.011481281
BAG4	-1.185963511	0.008636447
ATG13	-1.51123156	0.01221896
FABP7	-1.641898282	0.019258665
PRDM14	-1.539910614	0.0407904
FSD1L	-1.012596749	0.001385677
GNGT2	1.248813029	0.000974905
SIRPB2	1.107697808	0.000111391
TRPV3	-1.746457916	0.001100261
FAM110B	-1.033553407	0.00071336
TECRL	-1.687221641	0.004631519
SCN5A	-2.237861721	0.000586269
CD7	1.719045021	6.06E-05
HLA-DRB5	1.956449994	9.08E-05
ANGPTL7	-3.152459589	0.00123686
PLCB4	-1.053296357	0.001285409
LY6H	1.233848664	0.006602989
HPGDS	1.29374622	4.54E-05
GPR34	1.456587527	1.12E-05
GJA4	1.177893004	5.61E-05
CRYBB1	1.036249303	4.95E-06
DBNDD1	-2.514544033	0.00995752
WNT11	-2.011032603	0.000420399
RHD	-1.649864504	0.026900643
S100Z	1.249317804	4.79E-05
SLC15A1	-1.743390096	0.044915293
CD33	1.053533049	1.82E-05
EFNA3	-1.137717291	0.004119334
HOOK2	-1.599528318	0.023598605
FGFR4	-1.966782841	0.043099205
ZYG11A	-1.270338239	0.00200876
LRRC74B	-1.202684744	0.017649686
CLTRN	-1.32503439	0.031258865
FCGR2B	1.671171745	1.04E-05
PIK3R5	1.2408097	8.67E-06
PRRT4	-1.633959643	0.004246062
PAX1	-1.721460192	0.035553617
SRPK3	-2.290611006	0.0016788
RETN	2.651092341	2.28E-05
CD163	1.572017053	4.24E-07
CD4	1.123198639	8.64E-07
ARL11	1.0410494	3.85E-05
CCL13	1.039512507	0.001590142
NTRK3	-1.19540015	0.033605726
CCL23	1.871766425	0.000372116
SIT1	1.595184132	9.21E-05
CCL28	-1.01671781	8.96E-05
SAMD5	-1.79407974	0.002796284
COL9A1	-3.229257403	0.013985113
C3orf49	-1.046227837	0.029178268
TENT5C	-1.088152236	0.026145572
CDHR5	-1.591747287	0.015959195
ALAS2	2.646982989	0.048580077
PCDHGA9	-1.28552587	0.038588891
RIMS2	-1.256461448	0.024662013
HSPB8	-1.616765425	0.015774974
PRND	1.160578743	0.045467933
NEURL3	1.002516656	0.026408865
AL020996.2	-1.512148842	0.02197332
CFP	1.251008694	0.000135533
ZNF891	-1.001373461	0.000512116
PILRA	1.268067042	1.58E-07
CYTH4	1.081050516	3.30E-06
NCAM1	-1.044035538	0.006477789
NEK5	-1.253124806	0.003062441
RREB1	-1.328455639	0.007116205
NPHP3-ACAD11	-1.045269354	0.03122017
CXCL11	1.768989417	0.007929962
HLA-DRB1	1.795198588	5.08E-09
NFAM1	1.01544333	5.33E-05
BTBD11	-1.268209721	0.034579678
OR2L2	-1.011409593	0.009496079
FCGR3B	1.779128916	0.000125142
CECR2	-1.348930649	0.019530644
RGPD1	-1.317364246	0.043421181
P2RY13	1.218954541	0.000133067
