# Supplementary material for: TREM2 as a Prognostic Biomarker for Osteosarcoma Microenvironment Remodeling
Source: J Oncol. 2023 Feb 17;2023:3677789. doi: 10.1155/2023/3677789 (PMC9957636; doi:10.1155/2023/3677789)
Supplement: Supplementary Materials — The Supplementary Figures and Tables for this article can be found online at: https://doi.org/10.6084/m9.figshare.21972614.v1. Supplementary Figure 1: the GO and KEGG enrichment analysis. (A, B) The GO enrichment analysis. (C, D) The KEGG enrichment analysis. Supplementary Figure 2: relationship between TREM2 expression and clinical features. (A) Relationship between TREM2 expression and age. (B) Relationship between TREM2 expression and gender. Supplementary Table 1: immune infiltration score. The row is the ID of the sample and the column is the score, including StromalScore, ImmuneScore, and ESTIMATEScore. Supplementary Table 2: differentially expressed genes between high and low ImmuneScore groups. The row is the gene name, and the column is the fold change after taking the logarithm with the base of 2 and the adjusted P value in turn. Supplementary Table 3: differentially expressed genes between high and low StromalScore groups. The row is the gene name, and the column is the fold change after taking the logarithm with the base of 2 and the adjusted P value in turn. Supplementary Table 4: common differentially expressed genes shared by ImmuneScore groups and StromalScore groups. The row is the gene name and the column is the fold change after taking the logarithm with the base of 2. [file 3677789.f1.zip › Supplement Table 3.txt]

gene	logFC	fdr
SERPINB4	3.96618753	0.006668235
OPN3	-1.689431868	0.005202201
FCER1A	1.395666582	0.02404871
TPSAB1	1.287147548	0.019659709
CHI3L2	1.333731468	0.008243859
DLX2	-1.981887587	0.000189141
PLXDC1	1.494544957	0.000340959
AC009690.1	1.043472148	0.030983713
SSC5D	1.513683873	0.006117246
KIAA1549L	1.146947313	0.003251148
KIF26B	1.436420379	0.00484875
MYO16	-2.529756761	0.020471607
KRTAP13-1	-4.819843161	0.010501788
C1orf162	1.265336415	0.001094093
C3AR1	1.026568047	0.000191945
HMX2	-1.553977693	0.04176837
PRDM13	-2.775497934	0.017523186
SLC22A2	1.06600394	0.011831884
HTR2A	1.67428952	0.001697257
MYMX	2.578128416	0.019682397
CHML	-1.772665784	9.03E-05
AIM2	1.507912507	0.00484875
FERMT1	-1.064332744	0.012912679
GAD1	-1.213800513	0.019354222
ITGAM	1.169288022	0.000186943
SP7	-1.132346052	0.000340959
MMP19	1.205146448	0.000696495
RHPN2	-1.075593061	0.00484875
LKAAEAR1	-1.206577895	0.017134803
FOXA2	-1.295924315	0.027985937
MLC1	-1.151101229	0.00066476
C2orf40	2.537711196	0.048953636
FBN1	1.018381344	0.006117246
CYBB	1.298341922	0.000214913
SLC1A7	1.600857693	0.001594451
SYNC	1.517480186	0.010802434
MCIDAS	-1.125058722	0.029047236
ILDR2	-1.361340875	0.021056569
AEBP1	1.730449803	0.000139344
PRR36	-1.378167548	0.006668235
VNN2	1.008634395	0.033547025
C5orf49	1.333424825	0.040965817
PTPRZ1	-2.322097648	0.002514329
TREM1	1.359626388	0.016074138
CDCA7	-1.229078264	0.000716494
LPAR3	-1.362038966	0.002115806
PANX3	-1.661817052	0.000311072
HIST3H2BB	-1.407539264	0.01685534
C10orf142	1.473742349	0.010116285
COMP	1.874019794	0.027032015
P2RY12	1.200785888	0.018946231
SIGLEC1	1.178026315	0.001147825
ANKRD45	-1.10831428	0.00604111
ACKR1	2.267861758	0.001538295
HTR2B	1.632325967	4.01E-05
CCDC3	-1.167647361	0.000384955
C3	1.679688524	0.000445931
CSPG5	-1.263795542	0.001428466
SMPD3	-1.387717639	0.00135376
GALNT15	1.055711913	0.005558875
COL14A1	2.078106458	0.000306799
PTGFR	1.169704255	0.021322404
ORM1	2.074949885	0.014269554
FCGR1B	1.394579639	0.000243014
EPCAM	-1.511394408	0.01199522
FOLR1	-1.147390036	0.011831884
LY96	1.169042717	1.78E-05
FMO3	1.849664375	0.011671654
FAM189A2	-1.153793597	0.002178409
CPB1	1.637508196	0.005202201
FAM184A	-1.31431139	0.043185982
ANGPTL2	1.106028001	0.002262973
BMP8B	-1.121795608	0.02404871
SLC27A2	-2.311193897	0.015570237
NOL4	-1.678981502	0.019354222
OMG	1.477719159	0.032638263
APOD	1.647146101	0.013512268
NTRK1	1.660728211	0.014938353
MS4A4A	1.430174996	9.03E-05
HOMER2	-1.383654176	0.001874973
MATN3	1.303320583	0.011145704
SYT15	-1.301787459	0.021627095
ANGPT1	-1.08650816	0.049613569
CD80	1.063884721	0.039226599
CD37	1.124208543	0.000266628
USP28	-1.159508281	0.020103252
RIIAD1	2.506311473	0.027375591
FCGR1A	1.505347087	0.000103985
FAM163B	-2.213740596	0.036828217
FAP	1.358700242	0.000391108
MAP3K8	1.834163459	0.013389915
HBA1	2.078120992	0.004296826
RAMP3	1.360793574	0.002583337
ADORA3	1.111358665	0.002073434
CRISPLD2	1.8780697	4.01E-05
ALOX5AP	1.016707314	0.000442118
HSPA4L	-1.220712238	0.023369371
HEPH	2.290028984	0.004296826
LOXL1	1.595291651	0.000696495
CGREF1	-1.430423814	0.000888728
FXYD6	-1.132915788	0.000902759
SIGLEC5	1.03247125	0.004097226
KAZALD1	-1.087581453	0.005704439
PLXNC1	1.071294698	0.001002725
FGF10	1.740923651	0.014523502
PCDHGB7	1.279442031	0.033547025
ARX	-1.575994196	0.015346216
C1QB	1.183512083	0.000354744
CPNE7	-1.113123432	0.007574719
COLEC10	-2.043464061	0.004827962
OCA2	-2.154279539	0.032183231
ACTG2	3.03732438	0.000227931
AC005154.5	1.881637597	0.003871625
LYVE1	1.928198368	6.98E-05
ARHGAP44	-1.045155563	0.014516883
OR51E1	1.236235173	0.004442992
HOXB8	-1.367694998	0.032225268
OSM	1.208933715	0.011540226
FCGR2A	1.038524859	0.00014233
LTF	1.173862619	0.015346216
ATAD2	-1.149195963	0.013135752
INSRR	1.456816083	0.013135752
CD74	1.064165717	0.000237613
ADRA1A	-1.267881936	0.01685534
EMILIN3	-1.473337864	0.020691363
GPNMB	1.087885038	0.011145704
NID2	1.277114731	0.00014233
CASS4	1.061530088	0.021056569
CYFIP2	-1.555448484	0.006668235
CHST8	-1.417443222	0.024677526
IL10RA	1.277826669	0.000110324
C6orf118	-1.520533674	0.033662407
TPD52	-1.39140446	0.000636613
EFHD1	-1.191402403	0.005288252
FMO1	3.521931641	0.017723567
CHMP4C	-1.675571829	0.005653351
CLEC3B	1.237507094	0.000323133
TSPAN7	1.085213941	0.006470146
PDGFD	-1.008904209	0.039790453
RCOR2	-1.279090007	9.03E-05
NETO2	-1.603783146	0.03133633
HLA-DMA	1.078077266	0.000138626
MT1M	-1.209360417	0.021971263
MMP12	-2.354212669	0.039790453
NPAS1	-1.448060935	0.048278531
F13A1	1.943357323	4.21E-05
EGFL6	2.688703917	0.000184189
LBHD2	-2.277038646	0.003277605
AC233723.1	-2.753834159	0.006668235
MFAP2	1.050575708	0.020103252
CACNA1E	-1.594533541	0.011671654
CRISPLD1	1.158028754	0.001807178
CCR2	1.595523646	0.000222773
GIMAP5	1.031021561	0.001428466
CBSL	-1.057831265	0.032225268
CCIN	1.697641487	0.004853761
HMGA1	-1.260828523	0.004296826
MYEF2	-1.413983422	0.009219481
PDGFRB	1.131469436	0.000118796
CNTN1	1.226417809	0.02543772
SMOC2	1.419373895	0.005108947
MS4A1	1.451537593	0.036249957
CRYBA2	-3.149479958	0.004901788
UBE2U	2.90862888	0.046819951
ESX1	-3.227439194	0.0229673
SLC6A3	-2.045575991	0.043910267
PRAC2	-1.347635659	0.026467576
RBP5	1.403299744	0.019449953
ITM2A	1.089741839	0.048953636
MIP	-1.128015909	0.029992718
ZNF469	1.245382253	0.005438277
CPA3	2.358359371	0.001366598
PODXL2	-1.009187646	0.036940965
COL4A4	-1.112193654	0.011831884
IFITM5	-1.550840443	0.000330866
GADD45A	1.060696255	0.0018956
PAQR9	-2.162128987	0.003105331
HGF	1.163081991	0.00014233
DEPP1	1.880644909	0.008151455
BNIP3	-1.171980962	0.000681972
XPNPEP2	2.027114772	0.018002025
CD36	-1.030122612	0.024677526
NUP210	-1.129027908	0.027032015
BMX	1.345952012	0.004296826
OTX2	-4.588585368	0.001224341
NTN4	1.55448642	0.002217121
ZNF536	-2.492307504	0.043437024
VSIG4	1.866617982	4.01E-05
LCN6	1.191177718	0.036531227
ABCA3	-1.023303341	0.011831884
MANEAL	-1.581877713	0.020103252
CXCL12	1.512740573	0.000660362
INHBE	1.09299486	0.027674623
CCDC198	-1.068648794	0.041805373
KIAA1958	-1.243743152	0.000609504
APOL1	1.343015709	0.000445931
RHBDL2	-1.188423098	0.000266628
MELTF	-1.214900972	0.048953636
CDA	1.308722097	0.00046939
ASPN	1.326677865	0.010471493
CORT	-1.12328687	0.030983713
CD40LG	1.10772507	0.0038352
PDE3A	1.02493332	0.017723567
IL26	2.212970991	0.036249957
COL6A1	1.182020193	0.000318544
LRRC32	1.465588218	0.001807178
ERBB4	-1.328313334	0.008061394
MN1	1.151816676	0.004365001
PRG4	2.179872509	0.046032205
SEMA5B	1.257580255	0.000107201
NME8	1.163990278	0.005704439
COL6A2	1.075635419	0.000793153
WISP2	1.882569964	0.003277605
LOXL4	-1.31652821	0.03847828
CEBPA	1.165056803	0.001631527
CDX1	1.023310368	0.012647159
HSPA12B	1.046184473	0.000843784
DUSP26	-2.136670848	0.001516026
NHSL2	1.408630837	0.00014233
AQP3	1.310826708	0.047075967
CTSV	-1.139708739	0.002178409
EOMES	3.27218481	0.002884265
CCL14	1.298335064	0.017134803
COL3A1	1.295469248	0.001669463
IGFBP4	1.181226358	0.000141154
TMEM244	1.146880683	0.040385211
PNMA3	-1.361213274	0.042642105
GAS6	1.165196728	0.00014233
CD14	1.466097733	0.000227931
PNMA2	-1.255269409	0.002952669
ELOVL3	1.59141466	0.00849948
ST6GALNAC2	-1.280462597	0.007214477
C5orf46	1.523578943	0.047709227
MS4A14	1.189228431	0.000596294
IGLL5	1.962815651	0.001066839
MRGPRF	1.035450564	0.005704439
APLNR	1.275865187	0.001224341
HRH1	1.079814376	0.006117246
GCGR	-2.287667232	0.019143236
ARMC4	-1.209872065	0.010672762
MYT1	-1.575486166	0.02404871
CLEC2B	1.33493321	0.006995461
NPW	-1.641454307	0.045585147
WDR64	-1.795519302	0.029958113
PNMA6A	-1.331085533	0.024654133
LYZ	1.041634476	0.03133633
MPEG1	1.233924188	0.000149334
TACSTD2	1.324518382	0.032225268
NPB	-1.503964684	0.004712553
GFPT2	1.089048583	0.012693502
S1PR4	1.151174387	0.018652828
TFAP2D	-3.317304268	0.031621665
CTXN1	-1.774747404	0.021627095
OR8A1	-1.837887721	0.001934219
CD82	1.044301798	0.003944971
POU2F2	1.040215617	0.000545314
ITGA11	1.108006336	0.003871625
CILP2	1.669432568	0.047075967
LILRA1	1.336172593	0.000306799
MZB1	1.200784859	0.037467996
DIRAS3	1.323394442	0.005348862
CLEC10A	1.615667524	0.001428466
KLHL13	-1.226482616	0.02543772
CA3	-1.76865818	0.002514329
C1R	1.072539561	0.000726983
HTR1B	1.302655207	0.0018956
C1QTNF7	1.968940195	0.001568676
CHRNE	1.060406139	0.012693502
GSTM5	1.336919363	0.018002025
TMEM176B	1.100034812	0.001183864
GIMAP1	1.033584518	0.001026571
GEM	1.915180732	0.002884265
CD209	1.283279783	0.004365001
SOD3	1.208821028	0.00107055
RDH5	1.307748026	0.003251148
LGI2	1.006713571	0.005558875
DDIT4L	2.803589571	0.011671654
CSF3R	1.207391321	0.000902759
BHLHE22	2.6417967	0.000191945
TLR8	1.160094974	0.000726983
GLB1L2	-2.723117735	0.039226599
CTF1	1.315663026	0.001039189
CFAP300	-1.316309827	0.007574719
P2RY10	1.520073932	0.005033415
CKM	-1.368878477	0.039226599
ADAMTS15	1.994471773	0.006874457
STEAP4	1.052379427	0.011671654
DUSP19	-1.111585821	0.01199522
PRDM12	-2.091830693	0.019882971
ESPN	-1.639683458	0.004531034
KLRB1	1.648210248	0.000178736
HAND2	-1.579221232	0.010802434
AMBN	-1.481393836	0.010569324
PLEKHS1	1.019829724	0.000981777
CMA1	2.67991644	0.029324536
CHRNA5	-1.06856861	0.008243859
DLX4	-1.560139213	0.000272897
VGLL3	1.133145375	0.043185982
TLR4	1.17340609	0.00014233
SLC7A7	1.049524257	0.000206839
CCNE1	-1.49872745	0.034526443
TIMP4	1.334556825	0.040965817
TMEM30B	2.061702207	0.000741903
AL645922.1	1.941826583	0.000357002
COL8A2	1.404046357	0.012693502
KRT1	1.056628541	0.047942758
TMCC2	-1.299055161	0.000306799
BDKRB2	1.239495867	0.006794739
GAL	-2.158040685	0.020916309
GRIN2B	-2.023693965	0.045585147
TEX15	-1.37021424	0.017134803
SMAD9	-1.141605523	0.000625025
RAB11FIP1	-1.293440762	0.001518997
TEK	1.212109081	0.00066476
INSC	-1.177616854	0.000237613
C1QA	1.120173773	0.000453528
SLCO2B1	1.349583161	3.03E-05
SLC9A2	-1.284938909	0.007574719
DLX1	-1.27925562	0.005288252
MYOM2	-1.321460087	0.00019559
HES2	-1.402008748	0.027032015
LTBP2	1.272566297	0.003944971
MTNR1A	-1.726808281	0.032638263
MESP1	-1.248855626	0.007513417
SLC29A2	-1.177291226	0.008413258
ASPSCR1	-1.051379438	0.010471493
CARD11	1.119246214	0.000237613
CX3CR1	1.489172525	0.000237613
LY86	1.345463061	8.12E-05
COL15A1	1.104393443	0.000118796
GREB1L	-1.831785888	0.030474219
FXYD6-FXYD2	-1.337789779	0.006737214
LRRC55	1.351865934	0.003251148
MME	1.390134272	0.026605142
STAB1	1.160637962	0.000237613
KLHL23	-1.202648717	0.000545314
AMPH	1.19655531	0.02738905
OSR1	1.647838478	0.025054611
FCGR3A	1.190193911	0.003277605
PHLDB2	1.167018264	0.001039189
JAG2	-1.088177335	0.005438277
TREM2	1.103578555	0.000237613
NUDT8	-1.025113598	0.000266628
TGFBR3L	-2.020387091	0.002493991
IL2RA	1.13074557	0.000323133
MAST1	-1.221832427	0.00107055
TDO2	1.438445409	0.000545314
ECM2	1.082372657	0.00066476
OLFML2B	1.084324621	0.000696495
KRT12	1.331251329	0.03271942
LTB	1.41615755	0.004901788
POSTN	1.121161954	0.000237613
MMP20	-3.034476269	0.000946065
CD69	1.2243824	0.012543559
ASIP	1.231869708	0.043185982
ACTA2	1.381050602	0.00135376
CILP	1.042299573	0.004901788
KLHL30	-1.031404313	0.011145704
GPBAR1	1.047472856	0.021971263
ACSM5	1.073431636	0.001631527
PDK1	-1.373791457	0.000648505
SAMD11	-1.385165841	0.000946065
C2	1.171053786	0.000133156
DDN	-1.40709368	0.03847828
GAS1	1.570720175	0.002178409
FLNC	1.525612052	0.041944689
WDR72	-1.521712015	0.00849948
SLC6A2	-3.006929368	0.000716494
GAPT	1.476945565	0.000237613
APCDD1	-1.580905325	0.01199522
DLX3	-1.43164333	0.000195789
AC120114.4	2.001689371	0.023463361
EEF1A2	-2.234127062	0.03847828
MNDA	1.222545491	0.001224341
HOXD13	-1.034115358	0.022182849
C10orf55	1.154759663	0.000609504
NMD3	-1.010390383	0.047709227
MS4A6A	1.142647211	0.000237613
GGT5	1.021982919	0.000266628
ANKRD63	-2.705326465	0.009958576
SBK1	-1.472377646	0.018652828
TMSB15A	-1.408875945	0.029992718
ZIC2	-1.953337685	0.007730298
GNAI1	-1.152307608	0.001289108
IL10	1.347562272	0.002564863
BARX1	-1.494983632	0.045585147
PTHLH	1.271497722	0.009097679
SULF2	1.595232676	0.001328364
LGR6	-2.289321876	0.001328364
NCR3LG1	-1.1228329	0.020471607
RNASE3	1.414664576	0.014669049
C1QC	1.11651495	0.000716494
HBD	2.148440609	0.041440071
PHOSPHO1	-1.339691125	0.001066684
LILRA4	1.115030003	0.032790463
ADAMTS14	1.180405432	0.005348862
MYO3A	-1.8968066	0.044321275
JCHAIN	3.704884665	0.003079758
FAT3	-1.365064685	0.02738905
KIAA1755	1.076060781	0.039790453
AC129492.3	-1.706236006	0.039226599
SASH3	1.246159276	5.57E-05
HPDL	-1.14197647	0.015154768
ROBO2	-1.000686699	0.019773896
PCED1B	1.007055616	0.000237613
CKB	-1.015314998	0.004014064
NDNF	-1.525906194	0.00484875
TLR7	1.208687552	0.000189141
TAGLN	1.590372317	0.000696495
KLK3	-1.851155964	0.013214357
MSC	1.470715791	0.001163109
PLAU	1.198522997	0.001237295
ISLR	2.09873071	5.57E-05
ZDHHC22	-1.920057157	0.017634656
S100A9	2.108274249	0.040385211
DKK1	-2.834217906	0.001428466
DHH	1.070796383	0.012543559
FADS2	-1.120668813	0.000865972
TRIM17	-1.342053294	0.00867427
TNFSF8	1.14432292	0.000170463
ANOS1	1.151147888	0.036040636
KLHL4	2.330771961	0.005704439
VCAM1	1.596561129	0.00014233
CNKSR2	-1.039768072	0.006794739
ST6GAL2	1.336300194	0.009385314
ADAM33	1.4864067	0.022554461
HMOX1	1.481434091	0.011831884
RNASE2	2.100939672	0.001118191
COL24A1	-1.25183611	0.046146277
CTSH	1.093373681	0.011347578
SCG2	2.934692072	0.00135376
ZNF385B	-1.15556072	0.048953636
SPARCL1	1.097500926	0.002514329
HBA2	2.686888271	0.004164782
ADAP2	1.114870288	0.000237613
APOE	1.279349065	0.012912679
CHST13	-1.067699516	0.045585147
TP73	-3.376104735	0.000237613
ELANE	1.684371768	0.007253094
PROK2	-1.575812757	0.012344393
DNAI1	-1.23622694	0.003461951
HLA-DPA1	1.10603867	0.00019559
P4HA3	1.810910684	0.00013272
HTRA1	1.583252979	1.98E-05
ZNF695	-1.023327346	0.005348862
EDA2R	1.515837958	0.022182849
BAMBI	-1.241013442	0.000695358
DKK2	1.400967868	0.024677526
EPHA6	-1.910369471	0.039226599
CCR7	1.5149236	0.001200128
GJA5	1.697335379	0.000793153
SAPCD2	-1.289546639	9.03E-05
IL34	1.141631498	0.006359747
GPA33	2.034173134	0.015341492
FHL5	1.115661559	0.002493298
FPR1	1.238185344	0.001849323
CPE	-1.213619061	0.003339456
SBSN	1.425532614	0.020694402
MS4A7	1.436654992	3.03E-05
LRIG1	1.716607304	0.010672762
GNAT3	-1.826275258	0.029750295
C1S	1.450516696	0.00019526
ITPR1	1.1380889	0.015346216
CDK18	-1.040145331	0.007214477
RGS5	1.028044346	0.002297176
ZIC5	-1.94496701	0.006582698
HIST3H2A	-1.937029861	0.000660362
CD200R1	1.257006118	0.000141154
BGLAP	2.010658699	0.021971263
GPR174	1.151392782	0.011898312
CXADR	-1.878010228	4.01E-05
NOTUM	-2.163685637	0.004531034
TRIM7	-1.208364739	0.005558875
ENHO	-1.173065632	0.011145704
RUBCNL	1.100027757	0.000103985
SATB2	-1.050778132	0.002073434
NKAIN1	-1.44265393	0.047075967
SFRP4	1.621300449	0.000189141
PLS1	-1.305659858	0.004296826
BNC2	1.230638626	0.018002025
FGGY	1.053711274	0.002583337
TMEM170B	-1.195409867	0.03889365
ARSI	1.419446451	0.000981777
CD1C	1.80016319	0.027751891
SELE	1.783786447	0.010997671
ADAM29	-1.061093364	0.02738905
LAIR1	1.466893136	0.000110324
HBB	2.027138558	0.009901525
MMP8	1.218321809	0.018944354
CTSG	2.08946057	0.019430104
LILRB5	1.321510103	0.001538295
CACNA1C	1.008121802	0.004442992
LTK	-1.265546743	0.001183864
COCH	-2.66378545	0.000660362
PODN	1.777760614	9.03E-05
GRAMD1B	-1.119277144	0.009901525
ANO5	-1.641447967	0.000237613
CPNE5	-1.267070589	0.005438277
COL22A1	-1.887666771	0.002297176
ELOA3C	2.065985563	0.03889365
C14orf180	-1.901524223	0.001568676
COL16A1	1.076197735	0.004164782
COL11A2	-1.129392461	0.000695358
SIRPB2	1.079063456	0.003145364
HLA-DRB5	1.008728943	0.003461951
RAX	-2.240396011	0.006775237
SPON2	2.076507476	0.000266628
SQLE	-1.052101187	0.007513417
CSTA	1.362326182	0.000696495
SHISA3	-1.210218361	0.021803096
PCSK1N	-1.758369943	0.011471551
GPR34	1.356898998	0.000103985
GPR37	-1.840476024	0.002542755
HMCN1	1.158867551	0.006582698
MFAP4	2.629371166	0.002297176
PRR18	-1.330060618	0.033547025
KCNJ3	-1.223858704	0.021971263
LURAP1L	1.284952145	0.000607016
RIMKLA	-1.760875219	0.006874457
FCGR2B	1.025551641	0.000103985
CD163	1.250937449	0.000609504
SLCO2A1	1.245988651	0.002411287
KIF25	-1.098409972	0.001237295
TRIM58	-1.564976779	0.035557326
SOST	-3.401660203	0.00366903
GALNT14	-1.541623196	0.000311072
SLC8A3	-1.60604162	0.000660362
TMEM151A	-1.478253546	0.008569898
KLK1	-1.273522401	0.011798966
HLA-DRB1	1.001669907	0.000400796
PRTG	-1.540820793	0.000926498
