# Supplementary material for: TREM2 as a Prognostic Biomarker for Osteosarcoma Microenvironment Remodeling
Source: J Oncol. 2023 Feb 17;2023:3677789. doi: 10.1155/2023/3677789 (PMC9957636; doi:10.1155/2023/3677789)
Supplement: Supplementary Materials — The Supplementary Figures and Tables for this article can be found online at: https://doi.org/10.6084/m9.figshare.21972614.v1. Supplementary Figure 1: the GO and KEGG enrichment analysis. (A, B) The GO enrichment analysis. (C, D) The KEGG enrichment analysis. Supplementary Figure 2: relationship between TREM2 expression and clinical features. (A) Relationship between TREM2 expression and age. (B) Relationship between TREM2 expression and gender. Supplementary Table 1: immune infiltration score. The row is the ID of the sample and the column is the score, including StromalScore, ImmuneScore, and ESTIMATEScore. Supplementary Table 2: differentially expressed genes between high and low ImmuneScore groups. The row is the gene name, and the column is the fold change after taking the logarithm with the base of 2 and the adjusted P value in turn. Supplementary Table 3: differentially expressed genes between high and low StromalScore groups. The row is the gene name, and the column is the fold change after taking the logarithm with the base of 2 and the adjusted P value in turn. Supplementary Table 4: common differentially expressed genes shared by ImmuneScore groups and StromalScore groups. The row is the gene name and the column is the fold change after taking the logarithm with the base of 2. [file 3677789.f1.zip › Supplement Table 4.txt]

Gene	logFC
C1orf162	1.637617965
C3AR1	1.157415473
ITGAM	1.167460613
CYBB	1.517451482
VNN2	1.033192066
TREM1	1.241901638
SIGLEC1	1.478425012
C3	1.439145053
FCGR1B	1.305493641
LY96	1.092441718
MS4A4A	1.544741029
CD37	1.171280672
FCGR1A	1.581618892
HBA1	2.212559084
ADORA3	1.227112979
ALOX5AP	1.342200873
SIGLEC5	1.280960294
C1QB	1.674966685
OSM	1.645579955
FCGR2A	1.137846983
CD74	1.402649179
CASS4	1.031554798
IL10RA	1.311200716
CLEC3B	1.165881571
HLA-DMA	1.311171101
CCR2	1.601056865
GIMAP5	1.363787168
MS4A1	1.399737295
BMX	1.242662689
VSIG4	2.051423985
CDA	1.222671075
CD40LG	1.249636128
CCL14	1.297292758
CD14	1.79870509
MS4A14	1.161525071
IGLL5	1.521340045
LYZ	1.349659127
MPEG1	1.453295482
S1PR4	1.308431678
LILRA1	1.464813061
CLEC10A	1.53280498
TMEM176B	1.409066159
GIMAP1	1.221306709
CD209	1.519947202
CSF3R	1.126545581
TLR8	1.342888981
P2RY10	1.385081893
KLRB1	1.599147052
TLR4	1.1112453
C1QA	1.697060664
SLCO2B1	1.324015861
CARD11	1.130103116
LY86	1.481489797
STAB1	1.36887119
FCGR3A	1.70479816
TREM2	1.215137731
IL2RA	1.476183694
LTB	1.953734635
CD69	1.50461694
GPBAR1	1.457023829
MNDA	1.409005343
MS4A6A	1.40167084
IL10	1.528531699
C1QC	1.624814665
JCHAIN	3.349045545
SASH3	1.432790897
PCED1B	1.16689582
TLR7	1.138919833
S100A9	2.34568362
TNFSF8	1.136037275
HMOX1	1.403577679
RNASE2	1.639019326
HBA2	2.812311998
ADAP2	1.117918694
APOE	1.297364556
HLA-DPA1	1.328835089
GJA5	1.474859745
FPR1	1.308536907
MS4A7	1.374785063
GPR174	1.319783627
CD1C	1.584092213
HBB	2.101984593
LILRB5	1.310364802
SIRPB2	1.093380632
HLA-DRB5	1.482589468
GPR34	1.406743262
FCGR2B	1.348361693
CD163	1.411477251
HLA-DRB1	1.398434248
LPAR3	-1.211965372
OCA2	-2.04696023
ATAD2	-1.131469633
EMILIN3	-1.551635546
TPD52	-1.333031779
SLC6A3	-2.896713443
BNIP3	-1.207414555
KIAA1958	-1.205042922
CTSV	-1.244435455
GCGR	-2.092015697
DUSP19	-1.126442024
ESPN	-1.885940207
GRIN2B	-1.864488698
SLC29A2	-1.116491256
GREB1L	-1.587022216
KLHL23	-1.173534874
MAST1	-1.290013509
PDK1	-1.420461813
DDN	-1.445972259
EEF1A2	-2.037946866
NMD3	-1.314665327
BARX1	-1.56350576
NCR3LG1	-1.075954844
ZDHHC22	-1.755018157
CNKSR2	-1.370569378
ZNF385B	-1.441620448
ENHO	-1.132307332
NKAIN1	-1.379867384
COCH	-2.10465294
